# Supplementary material for: Transcriptomic analysis reveals novel downstream regulatory motifs and highly transcribed virulence factor genes of Entamoeba histolytica
Source: BMC Genomics. 2019 Mar 12;20:206. doi: 10.1186/s12864-019-5570-z (PMC6416950; doi:10.1186/s12864-019-5570-z)
Supplement: Supplementary file 14 — Core promoter sequence in Eh genes. (XLSX 75 kb) [file 12864_2019_5570_MOESM14_ESM.xlsx]

## Sheet: VH core promoter
		Core promoter sequences in VH class.
		Core Promoter Motifs	Gene_ID	start	stop	p-value	matched_sequence
		AAAAATTCA	EHI_069450	86	94	7.94e-06	AAAAATTCA
		AAAAATTCA	EHI_000510	79	87	7.94e-06	AAAAATTCA
		AAAAATTCA	EHI_064710	78	86	7.94e-06	AAAAATTCA
		AAAGAACT	EHI_037130	53	60	2.41e-05	AAAGAACT
		AAAGAACT	EHI_037130	69	76	2.41e-05	AAAGAACT
		AAAGAACT	EHI_068200	23	30	2.41e-05	AAAGAACT
		AAAGAACT	EHI_068200	70	77	2.41e-05	AAAGAACT
		AAAGAACT	EHI_111980	82	89	2.41e-05	AAAGAACT
		AAAGAACT	EHI_023500	80	87	2.41e-05	AAAGAACT
		AAAGAACT	EHI_038620	76	83	2.41e-05	AAAGAACT
		AAAGAACT	EHI_192090	76	83	2.41e-05	AAAGAACT
		AAAGAACT	EHI_146530	75	82	2.41e-05	AAAGAACT
		AAAGAACT	EHI_152610	75	82	2.41e-05	AAAGAACT
		AAAGAACT	EHI_124850	74	81	2.41e-05	AAAGAACT
		AAAGAACT	EHI_048170	73	80	2.41e-05	AAAGAACT
		AAAGAACT	EHI_197030	73	80	2.41e-05	AAAGAACT
		AAAGAACT	EHI_020080	72	79	2.41e-05	AAAGAACT
		AAAGAACT	EHI_182730	72	79	2.41e-05	AAAGAACT
		AAAGAACT	EHI_048240	71	78	2.41e-05	AAAGAACT
		AAAGAACT	EHI_111570	71	78	2.41e-05	AAAGAACT
		AAAGAACT	EHI_136160	71	78	2.41e-05	AAAGAACT
		AAAGAACT	EHI_160980	71	78	2.41e-05	AAAGAACT
		AAAGAACT	EHI_054740	70	77	2.41e-05	AAAGAACT
		AAAGAACT	EHI_058090	70	77	2.41e-05	AAAGAACT
		AAAGAACT	EHI_092470	70	77	2.41e-05	AAAGAACT
		AAAGAACT	EHI_140370	69	76	2.41e-05	AAAGAACT
		AAAGAACT	EHI_126140	67	74	2.41e-05	AAAGAACT
		AAAGAACT	EHI_188850	67	74	2.41e-05	AAAGAACT
		AAAGAACT	EHI_009870	66	73	2.41e-05	AAAGAACT
		AAAGAACT	EHI_027570	65	72	2.41e-05	AAAGAACT
		AAAGAACT	EHI_073470	65	72	2.41e-05	AAAGAACT
		AAAGAACT	EHI_108610	65	72	2.41e-05	AAAGAACT
		AAAGAACT	EHI_137720	65	72	2.41e-05	AAAGAACT
		AAAGAACT	EHI_153540	65	72	2.41e-05	AAAGAACT
		AAAGAACT	EHI_069560	64	71	2.41e-05	AAAGAACT
		AAAGAACT	EHI_056480	63	70	2.41e-05	AAAGAACT
		AAAGAACT	EHI_140550	63	70	2.41e-05	AAAGAACT
		AAAGAACT	EHI_142210	63	70	2.41e-05	AAAGAACT
		AAAGAACT	EHI_069060	62	69	2.41e-05	AAAGAACT
		AAAGAACT	EHI_127330	62	69	2.41e-05	AAAGAACT
		AAAGAACT	EHI_192110	61	68	2.41e-05	AAAGAACT
		AAAGAACT	EHI_141940	54	61	2.41e-05	AAAGAACT
		AAAGAACT	EHI_198760	49	56	2.41e-05	AAAGAACT
		AAAGAACT	EHI_182670	38	45	2.41e-05	AAAGAACT
		AAAGAACT	EHI_098280	35	42	2.41e-05	AAAGAACT
		AAAGAACT	EHI_126870	8	15	2.41e-05	AAAGAACT
		TATTTAAA	EHI_033710	67	74	3.22e-05	TATTTAAA
		TATTTAAA	EHI_062790	67	74	3.22e-05	TATTTAAA
		TATTTAAA	EHI_074180	67	74	3.22e-05	TATTTAAA
		TATTTAAA	EHI_168240	67	74	3.22e-05	TATTTAAA
		TATTTAAA	EHI_116360	66	73	3.22e-05	TATTTAAA
		TATTTAAA	EHI_148190	66	73	3.22e-05	TATTTAAA
		TATTTAAA	EHI_080200	65	72	3.22e-05	TATTTAAA
		TATTTAAA	EHI_131360	65	72	3.22e-05	TATTTAAA
		TATTTAAA	EHI_169800	65	72	3.22e-05	TATTTAAA
		TATTTAAA	EHI_186470	65	72	3.22e-05	TATTTAAA
		TATTTAAA	EHI_081410	63	70	3.22e-05	TATTTAAA
		TATTTAAA	EHI_165350	63	70	3.22e-05	TATTTAAA
		TATTTAAA	EHI_013900	62	69	3.22e-05	TATTTAAA
		TATTTAAA	EHI_159160	60	67	3.22e-05	TATTTAAA
		TATTTAAA	EHI_107290	59	66	3.22e-05	TATTTAAA
		TATTTAAA	EHI_126190	59	66	3.22e-05	TATTTAAA
		TATTTAAA	EHI_142730	59	66	3.22e-05	TATTTAAA
		TATTTAAA	EHI_159150	59	66	3.22e-05	TATTTAAA
		TATTTAAA	EHI_161200	59	66	3.22e-05	TATTTAAA
		TATTTAAA	EHI_163750	59	66	3.22e-05	TATTTAAA
		TATTTAAA	EHI_182900	59	66	3.22e-05	TATTTAAA
		TATTTAAA	EHI_140120	58	65	3.22e-05	TATTTAAA
		TATTTAAA	EHI_050280	57	64	3.22e-05	TATTTAAA
		TATTTAAA	EHI_169350	57	64	3.22e-05	TATTTAAA
		TATTTAAA	EHI_009620	56	63	3.22e-05	TATTTAAA
		TATTTAAA	EHI_058090	56	63	3.22e-05	TATTTAAA
		TATTTAAA	EHI_099790	56	63	3.22e-05	TATTTAAA
		TATTTAAA	EHI_158570	56	63	3.22e-05	TATTTAAA
		TATTTAAA	EHI_198760	56	63	3.22e-05	TATTTAAA
		TATTTAAA	EHI_011210	55	62	3.22e-05	TATTTAAA
		TATTTAAA	EHI_102170	55	62	3.22e-05	TATTTAAA
		TATTTAAA	EHI_199660	55	62	3.22e-05	TATTTAAA
		TATTTAAA	EHI_159480	52	59	3.22e-05	TATTTAAA
		TATTTAAA	EHI_194540	50	57	3.22e-05	TATTTAAA
		TATTTAAA	EHI_009840	49	56	3.22e-05	TATTTAAA
		TATTTAAA	EHI_135080	49	56	3.22e-05	TATTTAAA
		TATTTAAA	EHI_038620	37	44	3.22e-05	TATTTAAA
		TATTTAAA	EHI_198670	34	41	3.22e-05	TATTTAAA
		TATTTAAA	EHI_037130	29	36	3.22e-05	TATTTAAA
		TATTTAAA	EHI_077530	29	36	3.22e-05	TATTTAAA
		TATTTAAA	EHI_193080	18	25	3.22e-05	TATTTAAA
		TATTTAAA	EHI_005970	17	24	3.22e-05	TATTTAAA
		TATTTAAA	EHI_048140	10	17	3.22e-05	TATTTAAA
		TATTTAAA	EHI_199990	1	8	3.22e-05	TATTTAAA

## Sheet: H core promoter
		Core promoter sequences in H class.
		Core Promoter Motifs	Gene_ID	start	stop	p-value	matched_sequence
		AAAGAACT	EHI_128100	71	78	2.41e-05	AAAGAACT
		AAAGAACT	EHI_128100	81	88	2.41e-05	AAAGAACT
		AAAGAACT	EHI_068240	59	66	2.41e-05	AAAGAACT
		AAAGAACT	EHI_068240	77	84	2.41e-05	AAAGAACT
		AAAGAACT	EHI_144710	58	65	2.41e-05	AAAGAACT
		AAAGAACT	EHI_144710	71	78	2.41e-05	AAAGAACT
		AAAGAACT	EHI_134720	41	48	2.41e-05	AAAGAACT
		AAAGAACT	EHI_134720	56	63	2.41e-05	AAAGAACT
		TATTTAAA	EHI_142090	94	101	3.22e-05	TATTTAAA
		TATTTAAA	EHI_035630	92	99	3.22e-05	TATTTAAA
		TATTTAAA	EHI_054690	91	98	3.22e-05	TATTTAAA
		AAAGAACT	EHI_122850	90	97	2.41e-05	AAAGAACT
		AAAAATTCA	EHI_004230	89	97	7.94e-06	AAAAATTCA
		AAAAATTCA	EHI_012270	88	96	7.94e-06	AAAAATTCA
		AAAAATTCA	EHI_081270	85	93	7.94e-06	AAAAATTCA
		AAAGAACT	EHI_117820	85	92	2.41e-05	AAAGAACT
		AAAGAACT	EHI_020330	82	89	2.41e-05	AAAGAACT
		AAAGAACT	EHI_098000	82	89	2.41e-05	AAAGAACT
		AAAGAACT	EHI_202600	82	89	2.41e-05	AAAGAACT
		AAAGAACT	EHI_092620	81	88	2.41e-05	AAAGAACT
		AAAGAACT	EHI_095180	81	88	2.41e-05	AAAGAACT
		AAAGAACT	EHI_197560	81	88	2.41e-05	AAAGAACT
		AAAGAACT	EHI_199590	81	88	2.41e-05	AAAGAACT
		AAAGAACT	EHI_025230	80	87	2.41e-05	AAAGAACT
		AAAGAACT	EHI_136440	80	87	2.41e-05	AAAGAACT
		AAAGAACT	EHI_142090	80	87	2.41e-05	AAAGAACT
		AAAGAACT	EHI_160740	80	87	2.41e-05	AAAGAACT
		AAAGAACT	EHI_005960	79	86	2.41e-05	AAAGAACT
		AAAGAACT	EHI_025100	79	86	2.41e-05	AAAGAACT
		TATTTAAA	EHI_103270	79	86	3.22e-05	TATTTAAA
		AAAAATTCA	EHI_115300	78	86	7.94e-06	AAAAATTCA
		AAAGAACT	EHI_005020	78	85	2.41e-05	AAAGAACT
		AAAGAACT	EHI_073180	78	85	2.41e-05	AAAGAACT
		AAAGAACT	EHI_140350	78	85	2.41e-05	AAAGAACT
		AAAGAACT	EHI_146950	78	85	2.41e-05	AAAGAACT
		AAAGAACT	EHI_165070	78	85	2.41e-05	AAAGAACT
		AAAGAACT	EHI_174910	78	85	2.41e-05	AAAGAACT
		AAAGAACT	EHI_038590	77	84	2.41e-05	AAAGAACT
		AAAGAACT	EHI_104390	77	84	2.41e-05	AAAGAACT
		AAAGAACT	EHI_105210	77	84	2.41e-05	AAAGAACT
		AAAGAACT	EHI_131210	77	84	2.41e-05	AAAGAACT
		AAAGAACT	EHI_138790	77	84	2.41e-05	AAAGAACT
		AAAGAACT	EHI_188070	77	84	2.41e-05	AAAGAACT
		AAAGAACT	EHI_188900	76	83	2.41e-05	AAAGAACT
		AAAAATTCA	EHI_137700	75	83	7.94e-06	AAAAATTCA
		AAAAATTCA	EHI_176980	75	83	7.94e-06	AAAAATTCA
		AAAGAACT	EHI_040820	75	82	2.41e-05	AAAGAACT
		AAAGAACT	EHI_068230	75	82	2.41e-05	AAAGAACT
		AAAGAACT	EHI_110740	75	82	2.41e-05	AAAGAACT
		AAAGAACT	EHI_155700	75	82	2.41e-05	AAAGAACT
		AAAGAACT	EHI_175280	75	82	2.41e-05	AAAGAACT
		AAAGAACT	EHI_023360	74	81	2.41e-05	AAAGAACT
		AAAGAACT	EHI_114140	74	81	2.41e-05	AAAGAACT
		AAAGAACT	EHI_020350	73	80	2.41e-05	AAAGAACT
		AAAGAACT	EHI_033740	73	80	2.41e-05	AAAGAACT
		AAAGAACT	EHI_049330	73	80	2.41e-05	AAAGAACT
		AAAGAACT	EHI_088230	73	80	2.41e-05	AAAGAACT
		AAAGAACT	EHI_100270	73	80	2.41e-05	AAAGAACT
		TATTTAAA	EHI_170630	73	80	3.22e-05	TATTTAAA
		AAAGAACT	EHI_069370	72	79	2.41e-05	AAAGAACT
		AAAGAACT	EHI_092600	72	79	2.41e-05	AAAGAACT
		AAAGAACT	EHI_125740	72	79	2.41e-05	AAAGAACT
		AAAGAACT	EHI_136380	72	79	2.41e-05	AAAGAACT
		AAAGAACT	EHI_170110	72	79	2.41e-05	AAAGAACT
		AAAGAACT	EHI_194240	72	79	2.41e-05	AAAGAACT
		AAAGAACT	EHI_029030	71	78	2.41e-05	AAAGAACT
		AAAGAACT	EHI_137970	71	78	2.41e-05	AAAGAACT
		AAAGAACT	EHI_179390	71	78	2.41e-05	AAAGAACT
		AAAGAACT	EHI_188170	71	78	2.41e-05	AAAGAACT
		AAAGAACT	EHI_010340	70	77	2.41e-05	AAAGAACT
		AAAGAACT	EHI_125720	70	77	2.41e-05	AAAGAACT
		TATTTAAA	EHI_095850	70	77	3.22e-05	TATTTAAA
		AAAGAACT	EHI_042900	69	76	2.41e-05	AAAGAACT
		AAAGAACT	EHI_048730	69	76	2.41e-05	AAAGAACT
		TATTTAAA	EHI_060860	69	76	3.22e-05	TATTTAAA
		AAAAATTCA	EHI_095180	68	76	7.94e-06	AAAAATTCA
		AAAGAACT	EHI_078310	68	75	2.41e-05	AAAGAACT
		AAAGAACT	EHI_096830	68	75	2.41e-05	AAAGAACT
		AAAGAACT	EHI_138470	68	75	2.41e-05	AAAGAACT
		TATTTAAA	EHI_044370	68	75	3.22e-05	TATTTAAA
		AAAGAACT	EHI_004880	67	74	2.41e-05	AAAGAACT
		AAAGAACT	EHI_011870	67	74	2.41e-05	AAAGAACT
		AAAGAACT	EHI_074760	67	74	2.41e-05	AAAGAACT
		TATTTAAA	EHI_010850	67	74	3.22e-05	TATTTAAA
		TATTTAAA	EHI_188900	67	74	3.22e-05	TATTTAAA
		TATTTAAA	EHI_182800	67	74	3.22e-05	TATTTAAA
		TATTTAAA	EHI_158050	67	74	3.22e-05	TATTTAAA
		TATTTAAA	EHI_144040	67	74	3.22e-05	TATTTAAA
		TATTTAAA	EHI_039610	67	74	3.22e-05	TATTTAAA
		AAAGAACT	EHI_053190	66	73	2.41e-05	AAAGAACT
		AAAGAACT	EHI_095150	66	73	2.41e-05	AAAGAACT
		AAAGAACT	EHI_169820	66	73	2.41e-05	AAAGAACT
		AAAGAACT	EHI_194075	66	73	2.41e-05	AAAGAACT
		TATTTAAA	EHI_067090	66	73	3.22e-05	TATTTAAA
		TATTTAAA	EHI_100480	66	73	3.22e-05	TATTTAAA
		TATTTAAA	EHI_068250	66	73	3.22e-05	TATTTAAA
		AAAGAACT	EHI_007350	65	72	2.41e-05	AAAGAACT
		AAAGAACT	EHI_050940	65	72	2.41e-05	AAAGAACT
		AAAGAACT	EHI_103550	65	72	2.41e-05	AAAGAACT
		TATTTAAA	EHI_110000	65	72	3.22e-05	TATTTAAA
		TATTTAAA	EHI_058920	65	72	3.22e-05	TATTTAAA
		TATTTAAA	EHI_101730	65	72	3.22e-05	TATTTAAA
		TATTTAAA	EHI_098180	65	72	3.22e-05	TATTTAAA
		AAAAATTCA	EHI_107270	64	72	7.94e-06	AAAAATTCA
		AAAAATTCA	EHI_171280	64	72	7.94e-06	AAAAATTCA
		AAAGAACT	EHI_006040	64	71	2.41e-05	AAAGAACT
		AAAGAACT	EHI_023070	64	71	2.41e-05	AAAGAACT
		AAAGAACT	EHI_037160	64	71	2.41e-05	AAAGAACT
		AAAGAACT	EHI_050740	64	71	2.41e-05	AAAGAACT
		AAAGAACT	EHI_140740	64	71	2.41e-05	AAAGAACT
		TATTTAAA	EHI_131000	64	71	3.22e-05	TATTTAAA
		TATTTAAA	EHI_027600	64	71	3.22e-05	TATTTAAA
		AAAAATTCA	EHI_025850	63	71	7.94e-06	AAAAATTCA
		AAAGAACT	EHI_001810	63	70	2.41e-05	AAAGAACT
		AAAGAACT	EHI_022890	63	70	2.41e-05	AAAGAACT
		AAAGAACT	EHI_027640	63	70	2.41e-05	AAAGAACT
		AAAGAACT	EHI_042250	63	70	2.41e-05	AAAGAACT
		AAAGAACT	EHI_093740	63	70	2.41e-05	AAAGAACT
		AAAGAACT	EHI_128150	63	70	2.41e-05	AAAGAACT
		AAAGAACT	EHI_187090	63	70	2.41e-05	AAAGAACT
		TATTTAAA	EHI_132390	63	70	3.22e-05	TATTTAAA
		TATTTAAA	EHI_165070	63	70	3.22e-05	TATTTAAA
		AAAGAACT	EHI_012420	62	69	2.41e-05	AAAGAACT
		AAAGAACT	EHI_063550	62	69	2.41e-05	AAAGAACT
		TATTTAAA	EHI_169300	62	69	3.22e-05	TATTTAAA
		TATTTAAA	EHI_163490	62	69	3.22e-05	TATTTAAA
		TATTTAAA	EHI_092580	62	69	3.22e-05	TATTTAAA
		TATTTAAA	EHI_026480	62	69	3.22e-05	TATTTAAA
		TATTTAAA	EHI_156310	62	69	3.22e-05	TATTTAAA
		AAAGAACT	EHI_025290	61	68	2.41e-05	AAAGAACT
		TATTTAAA	EHI_050520	61	68	3.22e-05	TATTTAAA
		TATTTAAA	EHI_067590	61	68	3.22e-05	TATTTAAA
		AAAGAACT	EHI_158050	60	67	2.41e-05	AAAGAACT
		AAAGAACT	EHI_059680	59	66	2.41e-05	AAAGAACT
		AAAGAACT	EHI_151600	59	66	2.41e-05	AAAGAACT
		AAAGAACT	EHI_155310	59	66	2.41e-05	AAAGAACT
		AAAGAACT	EHI_178490	59	66	2.41e-05	AAAGAACT
		AAAGAACT	EHI_186900	59	66	2.41e-05	AAAGAACT
		TATTTAAA	EHI_134740	59	66	3.22e-05	TATTTAAA
		TATTTAAA	EHI_107250	59	66	3.22e-05	TATTTAAA
		TATTTAAA	EHI_052400	59	66	3.22e-05	TATTTAAA
		TATTTAAA	EHI_010570	59	66	3.22e-05	TATTTAAA
		TATTTAAA	EHI_094090	59	66	3.22e-05	TATTTAAA
		TATTTAAA	EHI_076020	59	66	3.22e-05	TATTTAAA
		TATTTAAA	EHI_134960	59	66	3.22e-05	TATTTAAA
		TATTTAAA	EHI_111000	58	65	3.22e-05	TATTTAAA
		TATTTAAA	EHI_014030	58	65	3.22e-05	TATTTAAA
		TATTTAAA	EHI_152760	58	65	3.22e-05	TATTTAAA
		TATTTAAA	EHI_152670	58	65	3.22e-05	TATTTAAA
		TATTTAAA	EHI_098560	58	65	3.22e-05	TATTTAAA
		AAAGAACT	EHI_001400	57	64	2.41e-05	AAAGAACT
		AAAGAACT	EHI_146180	57	64	2.41e-05	AAAGAACT
		AAAGAACT	EHI_148470	57	64	2.41e-05	AAAGAACT
		AAAGAACT	EHI_191770	57	64	2.41e-05	AAAGAACT
		TATTTAAA	EHI_200080	57	64	3.22e-05	TATTTAAA
		TATTTAAA	EHI_193360	57	64	3.22e-05	TATTTAAA
		TATTTAAA	EHI_167080	57	64	3.22e-05	TATTTAAA
		TATTTAAA	EHI_148270	57	64	3.22e-05	TATTTAAA
		TATTTAAA	EHI_142930	57	64	3.22e-05	TATTTAAA
		TATTTAAA	EHI_040370	57	64	3.22e-05	TATTTAAA
		TATTTAAA	EHI_065270	56	63	3.22e-05	TATTTAAA
		TATTTAAA	EHI_105350	56	63	3.22e-05	TATTTAAA
		TATTTAAA	EHI_142250	56	63	3.22e-05	TATTTAAA
		AAAGAACT	EHI_125830	55	62	2.41e-05	AAAGAACT
		AAAGAACT	EHI_178560	55	62	2.41e-05	AAAGAACT
		TATTTAAA	EHI_024230	55	62	3.22e-05	TATTTAAA
		TATTTAAA	EHI_015380	55	62	3.22e-05	TATTTAAA
		TATTTAAA	EHI_160930	55	62	3.22e-05	TATTTAAA
		TATTTAAA	EHI_120900	55	62	3.22e-05	TATTTAAA
		TATTTAAA	EHI_050940	54	61	3.22e-05	TATTTAAA
		TATTTAAA	EHI_099700	54	61	3.22e-05	TATTTAAA
		TATTTAAA	EHI_144610	54	61	3.22e-05	TATTTAAA
		TATTTAAA	EHI_064680	53	60	3.22e-05	TATTTAAA
		TATTTAAA	EHI_051840	53	60	3.22e-05	TATTTAAA
		TATTTAAA	EHI_092450	53	60	3.22e-05	TATTTAAA
		TATTTAAA	EHI_070720	53	60	3.22e-05	TATTTAAA
		TATTTAAA	EHI_135470	53	60	3.22e-05	TATTTAAA
		TATTTAAA	EHI_148470	52	59	3.22e-05	TATTTAAA
		TATTTAAA	EHI_025850	52	59	3.22e-05	TATTTAAA
		AAAAATTCA	EHI_182800	51	59	7.94e-06	AAAAATTCA
		AAAGAACT	EHI_025890	51	58	2.41e-05	AAAGAACT
		AAAGAACT	EHI_158100	50	57	2.41e-05	AAAGAACT
		TATTTAAA	EHI_001400	50	57	3.22e-05	TATTTAAA
		TATTTAAA	EHI_134810	50	57	3.22e-05	TATTTAAA
		AAAGAACT	EHI_052780	49	56	2.41e-05	AAAGAACT
		TATTTAAA	EHI_202460	49	56	3.22e-05	TATTTAAA
		TATTTAAA	EHI_160940	49	56	3.22e-05	TATTTAAA
		TATTTAAA	EHI_150490	49	56	3.22e-05	TATTTAAA
		AAAGAACT	EHI_107130	47	54	2.41e-05	AAAGAACT
		TATTTAAA	EHI_067850	47	54	3.22e-05	TATTTAAA
		TATTTAAA	EHI_065630	46	53	3.22e-05	TATTTAAA
		AAAGAACT	EHI_172960	45	52	2.41e-05	AAAGAACT
		AAAGAACT	EHI_198930	42	49	2.41e-05	AAAGAACT
		TATTTAAA	EHI_110690	42	49	3.22e-05	TATTTAAA
		TATTTAAA	EHI_155420	38	45	3.22e-05	TATTTAAA
		AAAAATTCA	EHI_194410	36	44	7.94e-06	AAAAATTCA
		TATTTAAA	EHI_083600	36	43	3.22e-05	TATTTAAA
		TATTTAAA	EHI_195140	35	42	3.22e-05	TATTTAAA
		TATTTAAA	EHI_179330	34	41	3.22e-05	TATTTAAA
		AAAGAACT	EHI_105860	33	40	2.41e-05	AAAGAACT
		TATTTAAA	EHI_025100	33	40	3.22e-05	TATTTAAA
		AAAGAACT	EHI_086690	32	39	2.41e-05	AAAGAACT
		AAAGAACT	EHI_087720	31	38	2.41e-05	AAAGAACT
		TATTTAAA	EHI_118670	30	37	3.22e-05	TATTTAAA
		AAAAATTCA	EHI_068480	29	37	7.94e-06	AAAAATTCA
		AAAGAACT	EHI_074080	28	35	2.41e-05	AAAGAACT
		TATTTAAA	EHI_035510	27	34	3.22e-05	TATTTAAA
		AAAAATTCA	EHI_044820	26	34	7.94e-06	AAAAATTCA
		TATTTAAA	EHI_086690	25	32	3.22e-05	TATTTAAA
		AAAGAACT	EHI_158150	23	30	2.41e-05	AAAGAACT
		TATTTAAA	EHI_121860	23	30	3.22e-05	TATTTAAA
		TATTTAAA	EHI_158240	23	30	3.22e-05	TATTTAAA
		AAAGAACT	EHI_054800	22	29	2.41e-05	AAAGAACT
		TATTTAAA	EHI_093910	22	29	3.22e-05	TATTTAAA
		AAAGAACT	EHI_010060	21	28	2.41e-05	AAAGAACT
		TATTTAAA	EHI_035670	20	27	3.22e-05	TATTTAAA
		TATTTAAA	EHI_010340	19	26	3.22e-05	TATTTAAA
		AAAAATTCA	EHI_152220	18	26	7.94e-06	AAAAATTCA
		AAAAATTCA	EHI_175050	18	26	7.94e-06	AAAAATTCA
		AAAGAACT	EHI_110120	16	23	2.41e-05	AAAGAACT
		TATTTAAA	EHI_148500	16	23	3.22e-05	TATTTAAA
		TATTTAAA	EHI_201200	16	23	3.22e-05	TATTTAAA
		TATTTAAA	EHI_168300	15	22	3.22e-05	TATTTAAA
		AAAGAACT	EHI_181250	14	21	2.41e-05	AAAGAACT
		TATTTAAA	EHI_054260	14	21	3.22e-05	TATTTAAA
		AAAGAACT	EHI_000440	13	20	2.41e-05	AAAGAACT
		AAAGAACT	EHI_010570	12	19	2.41e-05	AAAGAACT
		AAAGAACT	EHI_110690	10	17	2.41e-05	AAAGAACT
		TATTTAAA	EHI_098840	9	16	3.22e-05	TATTTAAA
		TATTTAAA	EHI_030790	7	14	3.22e-05	TATTTAAA
		AAAAATTCA	EHI_153190	6	14	7.94e-06	AAAAATTCA
		TATTTAAA	EHI_170120	6	13	3.22e-05	TATTTAAA
		TATTTAAA	EHI_188070	6	13	3.22e-05	TATTTAAA
		TATTTAAA	EHI_099190	5	12	3.22e-05	TATTTAAA
		AAAAATTCA	EHI_156330	3	11	7.94e-06	AAAAATTCA
		TATTTAAA	EHI_096340	2	9	3.22e-05	TATTTAAA
		TATTTAAA	EHI_052150	1	8	3.22e-05	TATTTAAA

## Sheet: M core promoter
			Core promoter sequences in M class.
			Core Promoter Motifs	Gene_ID	start	stop	p-value	matched_sequence
			AAAAATTCA	EHI_159520	2	10	7.94e-06	AAAAATTCA
			AAAAATTCA	EHI_156320	3	11	7.94e-06	AAAAATTCA
			AAAAATTCA	EHI_023090	5	13	7.94e-06	AAAAATTCA
			AAAAATTCA	EHI_169600	6	14	7.94e-06	AAAAATTCA
			AAAAATTCA	EHI_112060	7	15	7.94e-06	AAAAATTCA
			AAAAATTCA	EHI_079720	7	15	7.94e-06	AAAAATTCA
			AAAAATTCA	EHI_137060	8	16	7.94e-06	AAAAATTCA
			AAAAATTCA	EHI_096320	9	17	7.94e-06	AAAAATTCA
			AAAAATTCA	EHI_119310	10	18	7.94e-06	AAAAATTCA
			AAAAATTCA	EHI_014100	10	18	7.94e-06	AAAAATTCA
			AAAAATTCA	EHI_177590	14	22	7.94e-06	AAAAATTCA
			AAAAATTCA	EHI_147230	15	23	7.94e-06	AAAAATTCA
			AAAAATTCA	EHI_110780	17	25	7.94e-06	AAAAATTCA
			AAAAATTCA	EHI_073370	17	25	7.94e-06	AAAAATTCA
			AAAAATTCA	EHI_189100	21	29	7.94e-06	AAAAATTCA
			AAAAATTCA	EHI_156090	26	34	7.94e-06	AAAAATTCA
			AAAAATTCA	EHI_058520	32	40	7.94e-06	AAAAATTCA
			AAAAATTCA	EHI_148760	32	40	7.94e-06	AAAAATTCA
			AAAAATTCA	EHI_100390	33	41	7.94e-06	AAAAATTCA
			AAAAATTCA	EHI_189290	34	42	7.94e-06	AAAAATTCA
			AAAAATTCA	EHI_010660	35	43	7.94e-06	AAAAATTCA
			AAAAATTCA	EHI_137810	36	44	7.94e-06	AAAAATTCA
			AAAAATTCA	EHI_164780	36	44	7.94e-06	AAAAATTCA
			AAAAATTCA	EHI_144600	36	44	7.94e-06	AAAAATTCA
			AAAAATTCA	EHI_051890	37	45	7.94e-06	AAAAATTCA
			AAAAATTCA	EHI_179930	37	45	7.94e-06	AAAAATTCA
			AAAAATTCA	EHI_063790	39	47	7.94e-06	AAAAATTCA
			AAAAATTCA	EHI_067200	43	51	7.94e-06	AAAAATTCA
			AAAAATTCA	EHI_200780	48	56	7.94e-06	AAAAATTCA
			AAAAATTCA	EHI_065670	52	60	7.94e-06	AAAAATTCA
			AAAAATTCA	EHI_026380	55	63	7.94e-06	AAAAATTCA
			AAAAATTCA	EHI_117690	59	67	7.94e-06	AAAAATTCA
			AAAAATTCA	EHI_070700	63	71	7.94e-06	AAAAATTCA
			AAAAATTCA	EHI_178630	64	72	7.94e-06	AAAAATTCA
			AAAAATTCA	EHI_132040	67	75	7.94e-06	AAAAATTCA
			AAAAATTCA	EHI_086220	67	75	7.94e-06	AAAAATTCA
			AAAAATTCA	EHI_022940	68	76	7.94e-06	AAAAATTCA
			AAAAATTCA	EHI_194580	69	77	7.94e-06	AAAAATTCA
			AAAAATTCA	EHI_068130	71	79	7.94e-06	AAAAATTCA
			AAAAATTCA	EHI_105340	72	80	7.94e-06	AAAAATTCA
			AAAAATTCA	EHI_108660	72	80	7.94e-06	AAAAATTCA
			AAAAATTCA	EHI_107140	72	80	7.94e-06	AAAAATTCA
			AAAAATTCA	EHI_036870	72	80	7.94e-06	AAAAATTCA
			AAAAATTCA	EHI_000550	73	81	7.94e-06	AAAAATTCA
			AAAAATTCA	EHI_104950	75	83	7.94e-06	AAAAATTCA
			AAAAATTCA	EHI_192260	78	86	7.94e-06	AAAAATTCA
			AAAAATTCA	EHI_050380	79	87	7.94e-06	AAAAATTCA
			AAAAATTCA	EHI_133920	79	87	7.94e-06	AAAAATTCA
			AAAAATTCA	EHI_202050	79	87	7.94e-06	AAAAATTCA
			AAAAATTCA	EHI_022140	80	88	7.94e-06	AAAAATTCA
			AAAAATTCA	EHI_198790	80	88	7.94e-06	AAAAATTCA
			AAAAATTCA	EHI_143610	81	89	7.94e-06	AAAAATTCA
			AAAAATTCA	EHI_136190	81	89	7.94e-06	AAAAATTCA
			AAAAATTCA	EHI_142020	81	89	7.94e-06	AAAAATTCA
			AAAAATTCA	EHI_069250	82	90	7.94e-06	AAAAATTCA
			AAAAATTCA	EHI_193440	84	92	7.94e-06	AAAAATTCA
			AAAAATTCA	EHI_129780	84	92	7.94e-06	AAAAATTCA
			AAAAATTCA	EHI_000740	86	94	7.94e-06	AAAAATTCA
			AAAAATTCA	EHI_104940	87	95	7.94e-06	AAAAATTCA
			AAAAATTCA	EHI_009820	89	97	7.94e-06	AAAAATTCA
			AAAAATTCA	EHI_131230	91	99	7.94e-06	AAAAATTCA
			AAAAATTCA	EHI_006800	91	99	7.94e-06	AAAAATTCA
			AAAAATTCA	EHI_151580	91	99	7.94e-06	AAAAATTCA
			AAAAATTCA	EHI_197540	92	100	7.94e-06	AAAAATTCA
			AAAAATTCA	EHI_110610	92	100	7.94e-06	AAAAATTCA
			AAAAATTCA	EHI_093710	92	100	7.94e-06	AAAAATTCA
			AAAAATTCA	EHI_068490	92	100	7.94e-06	AAAAATTCA
			AAAAATTCA	EHI_142870	93	101	7.94e-06	AAAAATTCA
			AAAAATTCA	EHI_087830	93	101	7.94e-06	AAAAATTCA
			AAAGAACT	EHI_110710	1	8	2.41e-05	AAAGAACT
			AAAGAACT	EHI_107310	2	9	2.41e-05	AAAGAACT
			AAAGAACT	EHI_008630	3	10	2.41e-05	AAAGAACT
			AAAGAACT	EHI_148250	3	10	2.41e-05	AAAGAACT
			AAAGAACT	EHI_079210	4	11	2.41e-05	AAAGAACT
			AAAGAACT	EHI_099240	4	11	2.41e-05	AAAGAACT
			AAAGAACT	EHI_134010	4	11	2.41e-05	AAAGAACT
			AAAGAACT	EHI_059670	7	14	2.41e-05	AAAGAACT
			AAAGAACT	EHI_038680	8	15	2.41e-05	AAAGAACT
			AAAGAACT	EHI_085010	8	15	2.41e-05	AAAGAACT
			AAAGAACT	EHI_177500	8	15	2.41e-05	AAAGAACT
			AAAGAACT	EHI_151390	11	18	2.41e-05	AAAGAACT
			AAAGAACT	EHI_004640	13	20	2.41e-05	AAAGAACT
			AAAGAACT	EHI_008630	15	22	2.41e-05	AAAGAACT
			AAAGAACT	EHI_009970	16	23	2.41e-05	AAAGAACT
			AAAGAACT	EHI_131230	16	23	2.41e-05	AAAGAACT
			AAAGAACT	EHI_195080	18	25	2.41e-05	AAAGAACT
			AAAGAACT	EHI_011900	19	26	2.41e-05	AAAGAACT
			AAAGAACT	EHI_115710	19	26	2.41e-05	AAAGAACT
			AAAGAACT	EHI_044190	19	26	2.41e-05	AAAGAACT
			AAAGAACT	EHI_193450	20	27	2.41e-05	AAAGAACT
			AAAGAACT	EHI_153490	22	29	2.41e-05	AAAGAACT
			AAAGAACT	EHI_088090	24	31	2.41e-05	AAAGAACT
			AAAGAACT	EHI_111790	26	33	2.41e-05	AAAGAACT
			AAAGAACT	EHI_075170	31	38	2.41e-05	AAAGAACT
			AAAGAACT	EHI_098480	34	41	2.41e-05	AAAGAACT
			AAAGAACT	EHI_138520	34	41	2.41e-05	AAAGAACT
			AAAGAACT	EHI_151230	35	42	2.41e-05	AAAGAACT
			AAAGAACT	EHI_148590	35	42	2.41e-05	AAAGAACT
			AAAGAACT	EHI_011900	36	43	2.41e-05	AAAGAACT
			AAAGAACT	EHI_016000	37	44	2.41e-05	AAAGAACT
			AAAGAACT	EHI_127230	38	45	2.41e-05	AAAGAACT
			AAAGAACT	EHI_110770	39	46	2.41e-05	AAAGAACT
			AAAGAACT	EHI_095130	39	46	2.41e-05	AAAGAACT
			AAAGAACT	EHI_150520	40	47	2.41e-05	AAAGAACT
			AAAGAACT	EHI_001870	41	48	2.41e-05	AAAGAACT
			AAAGAACT	EHI_134020	41	48	2.41e-05	AAAGAACT
			AAAGAACT	EHI_083120	41	48	2.41e-05	AAAGAACT
			AAAGAACT	EHI_104460	41	48	2.41e-05	AAAGAACT
			AAAGAACT	EHI_049590	42	49	2.41e-05	AAAGAACT
			AAAGAACT	EHI_190870	43	50	2.41e-05	AAAGAACT
			AAAGAACT	EHI_196990	44	51	2.41e-05	AAAGAACT
			AAAGAACT	EHI_001080	44	51	2.41e-05	AAAGAACT
			AAAGAACT	EHI_098580	44	51	2.41e-05	AAAGAACT
			AAAGAACT	EHI_152560	45	52	2.41e-05	AAAGAACT
			AAAGAACT	EHI_146820	45	52	2.41e-05	AAAGAACT
			AAAGAACT	EHI_181230	45	52	2.41e-05	AAAGAACT
			AAAGAACT	EHI_184000	45	52	2.41e-05	AAAGAACT
			AAAGAACT	EHI_128070	46	53	2.41e-05	AAAGAACT
			AAAGAACT	EHI_100400	46	53	2.41e-05	AAAGAACT
			AAAGAACT	EHI_135430	47	54	2.41e-05	AAAGAACT
			AAAGAACT	EHI_014020	47	54	2.41e-05	AAAGAACT
			AAAGAACT	EHI_029580	47	54	2.41e-05	AAAGAACT
			AAAGAACT	EHI_127230	48	55	2.41e-05	AAAGAACT
			AAAGAACT	EHI_070700	48	55	2.41e-05	AAAGAACT
			AAAGAACT	EHI_167680	48	55	2.41e-05	AAAGAACT
			AAAGAACT	EHI_001770	48	55	2.41e-05	AAAGAACT
			AAAGAACT	EHI_124530	48	55	2.41e-05	AAAGAACT
			AAAGAACT	EHI_152350	48	55	2.41e-05	AAAGAACT
			AAAGAACT	EHI_118290	49	56	2.41e-05	AAAGAACT
			AAAGAACT	EHI_129510	49	56	2.41e-05	AAAGAACT
			AAAGAACT	EHI_035720	49	56	2.41e-05	AAAGAACT
			AAAGAACT	EHI_197070	50	57	2.41e-05	AAAGAACT
			AAAGAACT	EHI_147450	50	57	2.41e-05	AAAGAACT
			AAAGAACT	EHI_140360	50	57	2.41e-05	AAAGAACT
			AAAGAACT	EHI_107090	50	57	2.41e-05	AAAGAACT
			AAAGAACT	EHI_039860	50	57	2.41e-05	AAAGAACT
			AAAGAACT	EHI_010680	50	57	2.41e-05	AAAGAACT
			AAAGAACT	EHI_013290	51	58	2.41e-05	AAAGAACT
			AAAGAACT	EHI_035410	51	58	2.41e-05	AAAGAACT
			AAAGAACT	EHI_014150	51	58	2.41e-05	AAAGAACT
			AAAGAACT	EHI_171270	51	58	2.41e-05	AAAGAACT
			AAAGAACT	EHI_044540	51	58	2.41e-05	AAAGAACT
			AAAGAACT	EHI_045920	51	58	2.41e-05	AAAGAACT
			AAAGAACT	EHI_134840	51	58	2.41e-05	AAAGAACT
			AAAGAACT	EHI_095190	51	58	2.41e-05	AAAGAACT
			AAAGAACT	EHI_106680	52	59	2.41e-05	AAAGAACT
			AAAGAACT	EHI_050510	52	59	2.41e-05	AAAGAACT
			AAAGAACT	EHI_012340	52	59	2.41e-05	AAAGAACT
			AAAGAACT	EHI_151760	53	60	2.41e-05	AAAGAACT
			AAAGAACT	EHI_095120	53	60	2.41e-05	AAAGAACT
			AAAGAACT	EHI_140650	53	60	2.41e-05	AAAGAACT
			AAAGAACT	EHI_134970	54	61	2.41e-05	AAAGAACT
			AAAGAACT	EHI_104450	54	61	2.41e-05	AAAGAACT
			AAAGAACT	EHI_091100	54	61	2.41e-05	AAAGAACT
			AAAGAACT	EHI_148450	55	62	2.41e-05	AAAGAACT
			AAAGAACT	EHI_122820	55	62	2.41e-05	AAAGAACT
			AAAGAACT	EHI_122730	55	62	2.41e-05	AAAGAACT
			AAAGAACT	EHI_134680	55	62	2.41e-05	AAAGAACT
			AAAGAACT	EHI_009380	56	63	2.41e-05	AAAGAACT
			AAAGAACT	EHI_021220	56	63	2.41e-05	AAAGAACT
			AAAGAACT	EHI_156290	56	63	2.41e-05	AAAGAACT
			AAAGAACT	EHI_181530	57	64	2.41e-05	AAAGAACT
			AAAGAACT	EHI_087540	57	64	2.41e-05	AAAGAACT
			AAAGAACT	EHI_045410	57	64	2.41e-05	AAAGAACT
			AAAGAACT	EHI_079930	57	64	2.41e-05	AAAGAACT
			AAAGAACT	EHI_040700	58	65	2.41e-05	AAAGAACT
			AAAGAACT	EHI_185600	58	65	2.41e-05	AAAGAACT
			AAAGAACT	EHI_042100	58	65	2.41e-05	AAAGAACT
			AAAGAACT	EHI_104560	58	65	2.41e-05	AAAGAACT
			AAAGAACT	EHI_025490	58	65	2.41e-05	AAAGAACT
			AAAGAACT	EHI_158190	58	65	2.41e-05	AAAGAACT
			AAAGAACT	EHI_027770	58	65	2.41e-05	AAAGAACT
			AAAGAACT	EHI_129360	58	65	2.41e-05	AAAGAACT
			AAAGAACT	EHI_035150	59	66	2.41e-05	AAAGAACT
			AAAGAACT	EHI_045220	59	66	2.41e-05	AAAGAACT
			AAAGAACT	EHI_049750	59	66	2.41e-05	AAAGAACT
			AAAGAACT	EHI_178670	59	66	2.41e-05	AAAGAACT
			AAAGAACT	EHI_186320	59	66	2.41e-05	AAAGAACT
			AAAGAACT	EHI_031230	59	66	2.41e-05	AAAGAACT
			AAAGAACT	EHI_097650	59	66	2.41e-05	AAAGAACT
			AAAGAACT	EHI_098550	60	67	2.41e-05	AAAGAACT
			AAAGAACT	EHI_039860	60	67	2.41e-05	AAAGAACT
			AAAGAACT	EHI_099760	60	67	2.41e-05	AAAGAACT
			AAAGAACT	EHI_127390	60	67	2.41e-05	AAAGAACT
			AAAGAACT	EHI_019160	60	67	2.41e-05	AAAGAACT
			AAAGAACT	EHI_178990	61	68	2.41e-05	AAAGAACT
			AAAGAACT	EHI_010010	61	68	2.41e-05	AAAGAACT
			AAAGAACT	EHI_186880	61	68	2.41e-05	AAAGAACT
			AAAGAACT	EHI_068560	61	68	2.41e-05	AAAGAACT
			AAAGAACT	EHI_023210	61	68	2.41e-05	AAAGAACT
			AAAGAACT	EHI_000930	61	68	2.41e-05	AAAGAACT
			AAAGAACT	EHI_117570	61	68	2.41e-05	AAAGAACT
			AAAGAACT	EHI_099690	61	68	2.41e-05	AAAGAACT
			AAAGAACT	EHI_029580	61	68	2.41e-05	AAAGAACT
			AAAGAACT	EHI_167150	61	68	2.41e-05	AAAGAACT
			AAAGAACT	EHI_099870	61	68	2.41e-05	AAAGAACT
			AAAGAACT	EHI_071370	62	69	2.41e-05	AAAGAACT
			AAAGAACT	EHI_048620	62	69	2.41e-05	AAAGAACT
			AAAGAACT	EHI_148760	62	69	2.41e-05	AAAGAACT
			AAAGAACT	EHI_058450	62	69	2.41e-05	AAAGAACT
			AAAGAACT	EHI_177040	62	69	2.41e-05	AAAGAACT
			AAAGAACT	EHI_058460	62	69	2.41e-05	AAAGAACT
			AAAGAACT	EHI_079240	62	69	2.41e-05	AAAGAACT
			AAAGAACT	EHI_107930	62	69	2.41e-05	AAAGAACT
			AAAGAACT	EHI_011260	62	69	2.41e-05	AAAGAACT
			AAAGAACT	EHI_070120	62	69	2.41e-05	AAAGAACT
			AAAGAACT	EHI_147020	62	69	2.41e-05	AAAGAACT
			AAAGAACT	EHI_193800	62	69	2.41e-05	AAAGAACT
			AAAGAACT	EHI_141340	62	69	2.41e-05	AAAGAACT
			AAAGAACT	EHI_013190	62	69	2.41e-05	AAAGAACT
			AAAGAACT	EHI_159840	63	70	2.41e-05	AAAGAACT
			AAAGAACT	EHI_068620	63	70	2.41e-05	AAAGAACT
			AAAGAACT	EHI_149860	63	70	2.41e-05	AAAGAACT
			AAAGAACT	EHI_011900	63	70	2.41e-05	AAAGAACT
			AAAGAACT	EHI_194420	63	70	2.41e-05	AAAGAACT
			AAAGAACT	EHI_199720	63	70	2.41e-05	AAAGAACT
			AAAGAACT	EHI_202580	63	70	2.41e-05	AAAGAACT
			AAAGAACT	EHI_029590	63	70	2.41e-05	AAAGAACT
			AAAGAACT	EHI_151690	63	70	2.41e-05	AAAGAACT
			AAAGAACT	EHI_093730	63	70	2.41e-05	AAAGAACT
			AAAGAACT	EHI_126010	63	70	2.41e-05	AAAGAACT
			AAAGAACT	EHI_024590	63	70	2.41e-05	AAAGAACT
			AAAGAACT	EHI_163600	63	70	2.41e-05	AAAGAACT
			AAAGAACT	EHI_087820	63	70	2.41e-05	AAAGAACT
			AAAGAACT	EHI_148430	63	70	2.41e-05	AAAGAACT
			AAAGAACT	EHI_066740	63	70	2.41e-05	AAAGAACT
			AAAGAACT	EHI_095120	63	70	2.41e-05	AAAGAACT
			AAAGAACT	EHI_109690	63	70	2.41e-05	AAAGAACT
			AAAGAACT	EHI_012500	63	70	2.41e-05	AAAGAACT
			AAAGAACT	EHI_194980	64	71	2.41e-05	AAAGAACT
			AAAGAACT	EHI_148450	64	71	2.41e-05	AAAGAACT
			AAAGAACT	EHI_000140	64	71	2.41e-05	AAAGAACT
			AAAGAACT	EHI_155340	64	71	2.41e-05	AAAGAACT
			AAAGAACT	EHI_164740	64	71	2.41e-05	AAAGAACT
			AAAGAACT	EHI_051810	64	71	2.41e-05	AAAGAACT
			AAAGAACT	EHI_100330	64	71	2.41e-05	AAAGAACT
			AAAGAACT	EHI_139960	64	71	2.41e-05	AAAGAACT
			AAAGAACT	EHI_096400	64	71	2.41e-05	AAAGAACT
			AAAGAACT	EHI_162550	64	71	2.41e-05	AAAGAACT
			AAAGAACT	EHI_008730	64	71	2.41e-05	AAAGAACT
			AAAGAACT	EHI_019090	64	71	2.41e-05	AAAGAACT
			AAAGAACT	EHI_005910	64	71	2.41e-05	AAAGAACT
			AAAGAACT	EHI_158320	64	71	2.41e-05	AAAGAACT
			AAAGAACT	EHI_126950	64	71	2.41e-05	AAAGAACT
			AAAGAACT	EHI_002990	64	71	2.41e-05	AAAGAACT
			AAAGAACT	EHI_087010	64	71	2.41e-05	AAAGAACT
			AAAGAACT	EHI_087350	64	71	2.41e-05	AAAGAACT
			AAAGAACT	EHI_100400	64	71	2.41e-05	AAAGAACT
			AAAGAACT	EHI_013910	64	71	2.41e-05	AAAGAACT
			AAAGAACT	EHI_164320	64	71	2.41e-05	AAAGAACT
			AAAGAACT	EHI_074170	64	71	2.41e-05	AAAGAACT
			AAAGAACT	EHI_197300	64	71	2.41e-05	AAAGAACT
			AAAGAACT	EHI_136170	64	71	2.41e-05	AAAGAACT
			AAAGAACT	EHI_125810	64	71	2.41e-05	AAAGAACT
			AAAGAACT	EHI_011840	64	71	2.41e-05	AAAGAACT
			AAAGAACT	EHI_159730	64	71	2.41e-05	AAAGAACT
			AAAGAACT	EHI_098590	64	71	2.41e-05	AAAGAACT
			AAAGAACT	EHI_177530	65	72	2.41e-05	AAAGAACT
			AAAGAACT	EHI_105830	65	72	2.41e-05	AAAGAACT
			AAAGAACT	EHI_075700	65	72	2.41e-05	AAAGAACT
			AAAGAACT	EHI_026470	65	72	2.41e-05	AAAGAACT
			AAAGAACT	EHI_118120	65	72	2.41e-05	AAAGAACT
			AAAGAACT	EHI_088450	65	72	2.41e-05	AAAGAACT
			AAAGAACT	EHI_138500	65	72	2.41e-05	AAAGAACT
			AAAGAACT	EHI_082500	65	72	2.41e-05	AAAGAACT
			AAAGAACT	EHI_197870	65	72	2.41e-05	AAAGAACT
			AAAGAACT	EHI_045710	65	72	2.41e-05	AAAGAACT
			AAAGAACT	EHI_101240	65	72	2.41e-05	AAAGAACT
			AAAGAACT	EHI_142940	65	72	2.41e-05	AAAGAACT
			AAAGAACT	EHI_049430	65	72	2.41e-05	AAAGAACT
			AAAGAACT	EHI_192460	65	72	2.41e-05	AAAGAACT
			AAAGAACT	EHI_035380	65	72	2.41e-05	AAAGAACT
			AAAGAACT	EHI_006690	65	72	2.41e-05	AAAGAACT
			AAAGAACT	EHI_088060	65	72	2.41e-05	AAAGAACT
			AAAGAACT	EHI_119340	66	73	2.41e-05	AAAGAACT
			AAAGAACT	EHI_092610	66	73	2.41e-05	AAAGAACT
			AAAGAACT	EHI_010040	66	73	2.41e-05	AAAGAACT
			AAAGAACT	EHI_198010	66	73	2.41e-05	AAAGAACT
			AAAGAACT	EHI_010320	66	73	2.41e-05	AAAGAACT
			AAAGAACT	EHI_043020	66	73	2.41e-05	AAAGAACT
			AAAGAACT	EHI_197550	66	73	2.41e-05	AAAGAACT
			AAAGAACT	EHI_197040	66	73	2.41e-05	AAAGAACT
			AAAGAACT	EHI_058320	66	73	2.41e-05	AAAGAACT
			AAAGAACT	EHI_110470	66	73	2.41e-05	AAAGAACT
			AAAGAACT	EHI_018630	66	73	2.41e-05	AAAGAACT
			AAAGAACT	EHI_070230	67	74	2.41e-05	AAAGAACT
			AAAGAACT	EHI_111080	67	74	2.41e-05	AAAGAACT
			AAAGAACT	EHI_151280	67	74	2.41e-05	AAAGAACT
			AAAGAACT	EHI_001980	67	74	2.41e-05	AAAGAACT
			AAAGAACT	EHI_183010	67	74	2.41e-05	AAAGAACT
			AAAGAACT	EHI_000900	67	74	2.41e-05	AAAGAACT
			AAAGAACT	EHI_182870	67	74	2.41e-05	AAAGAACT
			AAAGAACT	EHI_044520	67	74	2.41e-05	AAAGAACT
			AAAGAACT	EHI_052740	67	74	2.41e-05	AAAGAACT
			AAAGAACT	EHI_194210	67	74	2.41e-05	AAAGAACT
			AAAGAACT	EHI_070760	67	74	2.41e-05	AAAGAACT
			AAAGAACT	EHI_044860	67	74	2.41e-05	AAAGAACT
			AAAGAACT	EHI_161900	67	74	2.41e-05	AAAGAACT
			AAAGAACT	EHI_041950	67	74	2.41e-05	AAAGAACT
			AAAGAACT	EHI_075200	67	74	2.41e-05	AAAGAACT
			AAAGAACT	EHI_109570	67	74	2.41e-05	AAAGAACT
			AAAGAACT	EHI_129740	67	74	2.41e-05	AAAGAACT
			AAAGAACT	EHI_128430	67	74	2.41e-05	AAAGAACT
			AAAGAACT	EHI_035760	67	74	2.41e-05	AAAGAACT
			AAAGAACT	EHI_132400	68	75	2.41e-05	AAAGAACT
			AAAGAACT	EHI_087560	68	75	2.41e-05	AAAGAACT
			AAAGAACT	EHI_001080	68	75	2.41e-05	AAAGAACT
			AAAGAACT	EHI_125880	68	75	2.41e-05	AAAGAACT
			AAAGAACT	EHI_178700	68	75	2.41e-05	AAAGAACT
			AAAGAACT	EHI_035940	68	75	2.41e-05	AAAGAACT
			AAAGAACT	EHI_078280	68	75	2.41e-05	AAAGAACT
			AAAGAACT	EHI_074700	68	75	2.41e-05	AAAGAACT
			AAAGAACT	EHI_168380	68	75	2.41e-05	AAAGAACT
			AAAGAACT	EHI_124440	68	75	2.41e-05	AAAGAACT
			AAAGAACT	EHI_195030	68	75	2.41e-05	AAAGAACT
			AAAGAACT	EHI_091070	68	75	2.41e-05	AAAGAACT
			AAAGAACT	EHI_179870	68	75	2.41e-05	AAAGAACT
			AAAGAACT	EHI_162340	68	75	2.41e-05	AAAGAACT
			AAAGAACT	EHI_151710	68	75	2.41e-05	AAAGAACT
			AAAGAACT	EHI_148860	68	75	2.41e-05	AAAGAACT
			AAAGAACT	EHI_066190	68	75	2.41e-05	AAAGAACT
			AAAGAACT	EHI_052050	68	75	2.41e-05	AAAGAACT
			AAAGAACT	EHI_126210	68	75	2.41e-05	AAAGAACT
			AAAGAACT	EHI_036880	68	75	2.41e-05	AAAGAACT
			AAAGAACT	EHI_080890	68	75	2.41e-05	AAAGAACT
			AAAGAACT	EHI_007300	68	75	2.41e-05	AAAGAACT
			AAAGAACT	EHI_129510	69	76	2.41e-05	AAAGAACT
			AAAGAACT	EHI_138970	69	76	2.41e-05	AAAGAACT
			AAAGAACT	EHI_125960	69	76	2.41e-05	AAAGAACT
			AAAGAACT	EHI_068120	69	76	2.41e-05	AAAGAACT
			AAAGAACT	EHI_197400	69	76	2.41e-05	AAAGAACT
			AAAGAACT	EHI_004480	69	76	2.41e-05	AAAGAACT
			AAAGAACT	EHI_007020	69	76	2.41e-05	AAAGAACT
			AAAGAACT	EHI_095070	69	76	2.41e-05	AAAGAACT
			AAAGAACT	EHI_096560	69	76	2.41e-05	AAAGAACT
			AAAGAACT	EHI_081390	69	76	2.41e-05	AAAGAACT
			AAAGAACT	EHI_170390	69	76	2.41e-05	AAAGAACT
			AAAGAACT	EHI_049780	69	76	2.41e-05	AAAGAACT
			AAAGAACT	EHI_110380	69	76	2.41e-05	AAAGAACT
			AAAGAACT	EHI_051890	69	76	2.41e-05	AAAGAACT
			AAAGAACT	EHI_087400	69	76	2.41e-05	AAAGAACT
			AAAGAACT	EHI_162540	70	77	2.41e-05	AAAGAACT
			AAAGAACT	EHI_118920	70	77	2.41e-05	AAAGAACT
			AAAGAACT	EHI_076000	70	77	2.41e-05	AAAGAACT
			AAAGAACT	EHI_121510	70	77	2.41e-05	AAAGAACT
			AAAGAACT	EHI_135460	70	77	2.41e-05	AAAGAACT
			AAAGAACT	EHI_005900	70	77	2.41e-05	AAAGAACT
			AAAGAACT	EHI_141790	70	77	2.41e-05	AAAGAACT
			AAAGAACT	EHI_179810	70	77	2.41e-05	AAAGAACT
			AAAGAACT	EHI_050980	70	77	2.41e-05	AAAGAACT
			AAAGAACT	EHI_148090	70	77	2.41e-05	AAAGAACT
			AAAGAACT	EHI_069340	70	77	2.41e-05	AAAGAACT
			AAAGAACT	EHI_091480	70	77	2.41e-05	AAAGAACT
			AAAGAACT	EHI_143560	70	77	2.41e-05	AAAGAACT
			AAAGAACT	EHI_165290	70	77	2.41e-05	AAAGAACT
			AAAGAACT	EHI_018640	70	77	2.41e-05	AAAGAACT
			AAAGAACT	EHI_086560	70	77	2.41e-05	AAAGAACT
			AAAGAACT	EHI_146190	70	77	2.41e-05	AAAGAACT
			AAAGAACT	EHI_039860	70	77	2.41e-05	AAAGAACT
			AAAGAACT	EHI_110350	70	77	2.41e-05	AAAGAACT
			AAAGAACT	EHI_154210	70	77	2.41e-05	AAAGAACT
			AAAGAACT	EHI_127340	70	77	2.41e-05	AAAGAACT
			AAAGAACT	EHI_169220	70	77	2.41e-05	AAAGAACT
			AAAGAACT	EHI_112810	70	77	2.41e-05	AAAGAACT
			AAAGAACT	EHI_069150	70	77	2.41e-05	AAAGAACT
			AAAGAACT	EHI_146150	70	77	2.41e-05	AAAGAACT
			AAAGAACT	EHI_194320	71	78	2.41e-05	AAAGAACT
			AAAGAACT	EHI_103560	71	78	2.41e-05	AAAGAACT
			AAAGAACT	EHI_170170	71	78	2.41e-05	AAAGAACT
			AAAGAACT	EHI_097630	71	78	2.41e-05	AAAGAACT
			AAAGAACT	EHI_179930	71	78	2.41e-05	AAAGAACT
			AAAGAACT	EHI_181220	71	78	2.41e-05	AAAGAACT
			AAAGAACT	EHI_117260	71	78	2.41e-05	AAAGAACT
			AAAGAACT	EHI_068600	71	78	2.41e-05	AAAGAACT
			AAAGAACT	EHI_091240	71	78	2.41e-05	AAAGAACT
			AAAGAACT	EHI_069600	71	78	2.41e-05	AAAGAACT
			AAAGAACT	EHI_166400	71	78	2.41e-05	AAAGAACT
			AAAGAACT	EHI_001860	71	78	2.41e-05	AAAGAACT
			AAAGAACT	EHI_174890	71	78	2.41e-05	AAAGAACT
			AAAGAACT	EHI_107930	71	78	2.41e-05	AAAGAACT
			AAAGAACT	EHI_168040	71	78	2.41e-05	AAAGAACT
			AAAGAACT	EHI_056360	71	78	2.41e-05	AAAGAACT
			AAAGAACT	EHI_056100	71	78	2.41e-05	AAAGAACT
			AAAGAACT	EHI_110490	71	78	2.41e-05	AAAGAACT
			AAAGAACT	EHI_124870	71	78	2.41e-05	AAAGAACT
			AAAGAACT	EHI_178500	71	78	2.41e-05	AAAGAACT
			AAAGAACT	EHI_153200	71	78	2.41e-05	AAAGAACT
			AAAGAACT	EHI_079220	71	78	2.41e-05	AAAGAACT
			AAAGAACT	EHI_083650	71	78	2.41e-05	AAAGAACT
			AAAGAACT	EHI_188110	71	78	2.41e-05	AAAGAACT
			AAAGAACT	EHI_156210	72	79	2.41e-05	AAAGAACT
			AAAGAACT	EHI_038990	72	79	2.41e-05	AAAGAACT
			AAAGAACT	EHI_096390	72	79	2.41e-05	AAAGAACT
			AAAGAACT	EHI_004980	72	79	2.41e-05	AAAGAACT
			AAAGAACT	EHI_080880	72	79	2.41e-05	AAAGAACT
			AAAGAACT	EHI_052040	72	79	2.41e-05	AAAGAACT
			AAAGAACT	EHI_127810	72	79	2.41e-05	AAAGAACT
			AAAGAACT	EHI_013310	72	79	2.41e-05	AAAGAACT
			AAAGAACT	EHI_147480	72	79	2.41e-05	AAAGAACT
			AAAGAACT	EHI_064320	72	79	2.41e-05	AAAGAACT
			AAAGAACT	EHI_154290	72	79	2.41e-05	AAAGAACT
			AAAGAACT	EHI_040630	72	79	2.41e-05	AAAGAACT
			AAAGAACT	EHI_142040	72	79	2.41e-05	AAAGAACT
			AAAGAACT	EHI_108700	72	79	2.41e-05	AAAGAACT
			AAAGAACT	EHI_131250	72	79	2.41e-05	AAAGAACT
			AAAGAACT	EHI_195010	72	79	2.41e-05	AAAGAACT
			AAAGAACT	EHI_045190	72	79	2.41e-05	AAAGAACT
			AAAGAACT	EHI_182690	72	79	2.41e-05	AAAGAACT
			AAAGAACT	EHI_110370	72	79	2.41e-05	AAAGAACT
			AAAGAACT	EHI_149900	73	80	2.41e-05	AAAGAACT
			AAAGAACT	EHI_175480	73	80	2.41e-05	AAAGAACT
			AAAGAACT	EHI_086030	73	80	2.41e-05	AAAGAACT
			AAAGAACT	EHI_073460	73	80	2.41e-05	AAAGAACT
			AAAGAACT	EHI_050800	73	80	2.41e-05	AAAGAACT
			AAAGAACT	EHI_087610	73	80	2.41e-05	AAAGAACT
			AAAGAACT	EHI_159450	73	80	2.41e-05	AAAGAACT
			AAAGAACT	EHI_153240	73	80	2.41e-05	AAAGAACT
			AAAGAACT	EHI_182610	73	80	2.41e-05	AAAGAACT
			AAAGAACT	EHI_179820	73	80	2.41e-05	AAAGAACT
			AAAGAACT	EHI_180330	73	80	2.41e-05	AAAGAACT
			AAAGAACT	EHI_128110	73	80	2.41e-05	AAAGAACT
			AAAGAACT	EHI_143780	73	80	2.41e-05	AAAGAACT
			AAAGAACT	EHI_065670	73	80	2.41e-05	AAAGAACT
			AAAGAACT	EHI_087840	73	80	2.41e-05	AAAGAACT
			AAAGAACT	EHI_048540	73	80	2.41e-05	AAAGAACT
			AAAGAACT	EHI_180660	73	80	2.41e-05	AAAGAACT
			AAAGAACT	EHI_079985	73	80	2.41e-05	AAAGAACT
			AAAGAACT	EHI_068360	74	81	2.41e-05	AAAGAACT
			AAAGAACT	EHI_049880	74	81	2.41e-05	AAAGAACT
			AAAGAACT	EHI_125860	74	81	2.41e-05	AAAGAACT
			AAAGAACT	EHI_106270	74	81	2.41e-05	AAAGAACT
			AAAGAACT	EHI_118850	74	81	2.41e-05	AAAGAACT
			AAAGAACT	EHI_092510	74	81	2.41e-05	AAAGAACT
			AAAGAACT	EHI_067390	74	81	2.41e-05	AAAGAACT
			AAAGAACT	EHI_092190	74	81	2.41e-05	AAAGAACT
			AAAGAACT	EHI_024560	74	81	2.41e-05	AAAGAACT
			AAAGAACT	EHI_200840	74	81	2.41e-05	AAAGAACT
			AAAGAACT	EHI_147870	74	81	2.41e-05	AAAGAACT
			AAAGAACT	EHI_127280	74	81	2.41e-05	AAAGAACT
			AAAGAACT	EHI_196365	74	81	2.41e-05	AAAGAACT
			AAAGAACT	EHI_096240	74	81	2.41e-05	AAAGAACT
			AAAGAACT	EHI_015280	74	81	2.41e-05	AAAGAACT
			AAAGAACT	EHI_163710	74	81	2.41e-05	AAAGAACT
			AAAGAACT	EHI_007480	74	81	2.41e-05	AAAGAACT
			AAAGAACT	EHI_035980	74	81	2.41e-05	AAAGAACT
			AAAGAACT	EHI_030060	74	81	2.41e-05	AAAGAACT
			AAAGAACT	EHI_126020	74	81	2.41e-05	AAAGAACT
			AAAGAACT	EHI_026490	74	81	2.41e-05	AAAGAACT
			AAAGAACT	EHI_011070	74	81	2.41e-05	AAAGAACT
			AAAGAACT	EHI_021500	74	81	2.41e-05	AAAGAACT
			AAAGAACT	EHI_050890	74	81	2.41e-05	AAAGAACT
			AAAGAACT	EHI_092530	75	82	2.41e-05	AAAGAACT
			AAAGAACT	EHI_010310	75	82	2.41e-05	AAAGAACT
			AAAGAACT	EHI_178990	75	82	2.41e-05	AAAGAACT
			AAAGAACT	EHI_001790	75	82	2.41e-05	AAAGAACT
			AAAGAACT	EHI_035720	75	82	2.41e-05	AAAGAACT
			AAAGAACT	EHI_189180	75	82	2.41e-05	AAAGAACT
			AAAGAACT	EHI_044360	75	82	2.41e-05	AAAGAACT
			AAAGAACT	EHI_068580	75	82	2.41e-05	AAAGAACT
			AAAGAACT	EHI_012040	75	82	2.41e-05	AAAGAACT
			AAAGAACT	EHI_160900	75	82	2.41e-05	AAAGAACT
			AAAGAACT	EHI_183100	75	82	2.41e-05	AAAGAACT
			AAAGAACT	EHI_004800	75	82	2.41e-05	AAAGAACT
			AAAGAACT	EHI_140150	75	82	2.41e-05	AAAGAACT
			AAAGAACT	EHI_020360	75	82	2.41e-05	AAAGAACT
			AAAGAACT	EHI_118440	76	83	2.41e-05	AAAGAACT
			AAAGAACT	EHI_008050	76	83	2.41e-05	AAAGAACT
			AAAGAACT	EHI_126990	76	83	2.41e-05	AAAGAACT
			AAAGAACT	EHI_194400	76	83	2.41e-05	AAAGAACT
			AAAGAACT	EHI_027750	76	83	2.41e-05	AAAGAACT
			AAAGAACT	EHI_189980	76	83	2.41e-05	AAAGAACT
			AAAGAACT	EHI_121900	76	83	2.41e-05	AAAGAACT
			AAAGAACT	EHI_135720	76	83	2.41e-05	AAAGAACT
			AAAGAACT	EHI_122740	76	83	2.41e-05	AAAGAACT
			AAAGAACT	EHI_025370	76	83	2.41e-05	AAAGAACT
			AAAGAACT	EHI_043010	76	83	2.41e-05	AAAGAACT
			AAAGAACT	EHI_152520	76	83	2.41e-05	AAAGAACT
			AAAGAACT	EHI_164340	76	83	2.41e-05	AAAGAACT
			AAAGAACT	EHI_083110	76	83	2.41e-05	AAAGAACT
			AAAGAACT	EHI_087870	76	83	2.41e-05	AAAGAACT
			AAAGAACT	EHI_047810	76	83	2.41e-05	AAAGAACT
			AAAGAACT	EHI_126150	76	83	2.41e-05	AAAGAACT
			AAAGAACT	EHI_156320	76	83	2.41e-05	AAAGAACT
			AAAGAACT	EHI_045350	76	83	2.41e-05	AAAGAACT
			AAAGAACT	EHI_137830	77	84	2.41e-05	AAAGAACT
			AAAGAACT	EHI_133100	77	84	2.41e-05	AAAGAACT
			AAAGAACT	EHI_135210	77	84	2.41e-05	AAAGAACT
			AAAGAACT	EHI_128180	77	84	2.41e-05	AAAGAACT
			AAAGAACT	EHI_152690	77	84	2.41e-05	AAAGAACT
			AAAGAACT	EHI_138310	77	84	2.41e-05	AAAGAACT
			AAAGAACT	EHI_015230	77	84	2.41e-05	AAAGAACT
			AAAGAACT	EHI_124460	77	84	2.41e-05	AAAGAACT
			AAAGAACT	EHI_008750	77	84	2.41e-05	AAAGAACT
			AAAGAACT	EHI_183510	77	84	2.41e-05	AAAGAACT
			AAAGAACT	EHI_098620	77	84	2.41e-05	AAAGAACT
			AAAGAACT	EHI_035490	77	84	2.41e-05	AAAGAACT
			AAAGAACT	EHI_104670	77	84	2.41e-05	AAAGAACT
			AAAGAACT	EHI_137980	77	84	2.41e-05	AAAGAACT
			AAAGAACT	EHI_118000	78	85	2.41e-05	AAAGAACT
			AAAGAACT	EHI_104420	78	85	2.41e-05	AAAGAACT
			AAAGAACT	EHI_085710	78	85	2.41e-05	AAAGAACT
			AAAGAACT	EHI_007910	78	85	2.41e-05	AAAGAACT
			AAAGAACT	EHI_145980	78	85	2.41e-05	AAAGAACT
			AAAGAACT	EHI_127210	78	85	2.41e-05	AAAGAACT
			AAAGAACT	EHI_009980	78	85	2.41e-05	AAAGAACT
			AAAGAACT	EHI_053420	78	85	2.41e-05	AAAGAACT
			AAAGAACT	EHI_110780	78	85	2.41e-05	AAAGAACT
			AAAGAACT	EHI_167040	78	85	2.41e-05	AAAGAACT
			AAAGAACT	EHI_023410	78	85	2.41e-05	AAAGAACT
			AAAGAACT	EHI_192490	78	85	2.41e-05	AAAGAACT
			AAAGAACT	EHI_158200	78	85	2.41e-05	AAAGAACT
			AAAGAACT	EHI_044650	78	85	2.41e-05	AAAGAACT
			AAAGAACT	EHI_154200	78	85	2.41e-05	AAAGAACT
			AAAGAACT	EHI_179360	79	86	2.41e-05	AAAGAACT
			AAAGAACT	EHI_202590	79	86	2.41e-05	AAAGAACT
			AAAGAACT	EHI_079280	79	86	2.41e-05	AAAGAACT
			AAAGAACT	EHI_058820	79	86	2.41e-05	AAAGAACT
			AAAGAACT	EHI_001990	79	86	2.41e-05	AAAGAACT
			AAAGAACT	EHI_158120	79	86	2.41e-05	AAAGAACT
			AAAGAACT	EHI_003900	79	86	2.41e-05	AAAGAACT
			AAAGAACT	EHI_069420	79	86	2.41e-05	AAAGAACT
			AAAGAACT	EHI_035540	79	86	2.41e-05	AAAGAACT
			AAAGAACT	EHI_092650	79	86	2.41e-05	AAAGAACT
			AAAGAACT	EHI_118240	79	86	2.41e-05	AAAGAACT
			AAAGAACT	EHI_157130	79	86	2.41e-05	AAAGAACT
			AAAGAACT	EHI_125920	79	86	2.41e-05	AAAGAACT
			AAAGAACT	EHI_152930	79	86	2.41e-05	AAAGAACT
			AAAGAACT	EHI_099810	79	86	2.41e-05	AAAGAACT
			AAAGAACT	EHI_112850	79	86	2.41e-05	AAAGAACT
			AAAGAACT	EHI_156280	79	86	2.41e-05	AAAGAACT
			AAAGAACT	EHI_187730	79	86	2.41e-05	AAAGAACT
			AAAGAACT	EHI_178540	79	86	2.41e-05	AAAGAACT
			AAAGAACT	EHI_126960	79	86	2.41e-05	AAAGAACT
			AAAGAACT	EHI_100090	79	86	2.41e-05	AAAGAACT
			AAAGAACT	EHI_147550	79	86	2.41e-05	AAAGAACT
			AAAGAACT	EHI_140490	79	86	2.41e-05	AAAGAACT
			AAAGAACT	EHI_162230	79	86	2.41e-05	AAAGAACT
			AAAGAACT	EHI_007960	80	87	2.41e-05	AAAGAACT
			AAAGAACT	EHI_014290	80	87	2.41e-05	AAAGAACT
			AAAGAACT	EHI_138510	80	87	2.41e-05	AAAGAACT
			AAAGAACT	EHI_177310	80	87	2.41e-05	AAAGAACT
			AAAGAACT	EHI_088050	80	87	2.41e-05	AAAGAACT
			AAAGAACT	EHI_051420	80	87	2.41e-05	AAAGAACT
			AAAGAACT	EHI_179990	80	87	2.41e-05	AAAGAACT
			AAAGAACT	EHI_151740	80	87	2.41e-05	AAAGAACT
			AAAGAACT	EHI_124570	80	87	2.41e-05	AAAGAACT
			AAAGAACT	EHI_177480	80	87	2.41e-05	AAAGAACT
			AAAGAACT	EHI_068530	80	87	2.41e-05	AAAGAACT
			AAAGAACT	EHI_115510	80	87	2.41e-05	AAAGAACT
			AAAGAACT	EHI_134030	80	87	2.41e-05	AAAGAACT
			AAAGAACT	EHI_056630	80	87	2.41e-05	AAAGAACT
			AAAGAACT	EHI_131220	80	87	2.41e-05	AAAGAACT
			AAAGAACT	EHI_130910	80	87	2.41e-05	AAAGAACT
			AAAGAACT	EHI_125670	81	88	2.41e-05	AAAGAACT
			AAAGAACT	EHI_189430	81	88	2.41e-05	AAAGAACT
			AAAGAACT	EHI_011370	81	88	2.41e-05	AAAGAACT
			AAAGAACT	EHI_125140	81	88	2.41e-05	AAAGAACT
			AAAGAACT	EHI_187780	81	88	2.41e-05	AAAGAACT
			AAAGAACT	EHI_091120	81	88	2.41e-05	AAAGAACT
			AAAGAACT	EHI_177670	81	88	2.41e-05	AAAGAACT
			AAAGAACT	EHI_013230	82	89	2.41e-05	AAAGAACT
			AAAGAACT	EHI_014000	82	89	2.41e-05	AAAGAACT
			AAAGAACT	EHI_077230	82	89	2.41e-05	AAAGAACT
			AAAGAACT	EHI_162190	82	89	2.41e-05	AAAGAACT
			AAAGAACT	EHI_151590	83	90	2.41e-05	AAAGAACT
			AAAGAACT	EHI_109820	83	90	2.41e-05	AAAGAACT
			AAAGAACT	EHI_050570	83	90	2.41e-05	AAAGAACT
			AAAGAACT	EHI_009970	83	90	2.41e-05	AAAGAACT
			AAAGAACT	EHI_053130	83	90	2.41e-05	AAAGAACT
			AAAGAACT	EHI_068060	84	91	2.41e-05	AAAGAACT
			AAAGAACT	EHI_039850	84	91	2.41e-05	AAAGAACT
			AAAGAACT	EHI_005100	84	91	2.41e-05	AAAGAACT
			AAAGAACT	EHI_069380	84	91	2.41e-05	AAAGAACT
			AAAGAACT	EHI_082490	84	91	2.41e-05	AAAGAACT
			AAAGAACT	EHI_108660	85	92	2.41e-05	AAAGAACT
			AAAGAACT	EHI_106250	87	94	2.41e-05	AAAGAACT
			AAAGAACT	EHI_196530	89	96	2.41e-05	AAAGAACT
			AAAGAACT	EHI_067920	89	96	2.41e-05	AAAGAACT
			AAAGAACT	EHI_126990	93	100	2.41e-05	AAAGAACT
			TATTTAAA	EHI_023460	2	9	3.22e-05	TATTTAAA
			TATTTAAA	EHI_110200	2	9	3.22e-05	TATTTAAA
			TATTTAAA	EHI_198700	3	10	3.22e-05	TATTTAAA
			TATTTAAA	EHI_093940	4	11	3.22e-05	TATTTAAA
			TATTTAAA	EHI_177330	5	12	3.22e-05	TATTTAAA
			TATTTAAA	EHI_106090	5	12	3.22e-05	TATTTAAA
			TATTTAAA	EHI_127850	5	12	3.22e-05	TATTTAAA
			TATTTAAA	EHI_038160	5	12	3.22e-05	TATTTAAA
			TATTTAAA	EHI_010620	6	13	3.22e-05	TATTTAAA
			TATTTAAA	EHI_030110	7	14	3.22e-05	TATTTAAA
			TATTTAAA	EHI_051690	7	14	3.22e-05	TATTTAAA
			TATTTAAA	EHI_179960	7	14	3.22e-05	TATTTAAA
			TATTTAAA	EHI_045610	8	15	3.22e-05	TATTTAAA
			TATTTAAA	EHI_011190	8	15	3.22e-05	TATTTAAA
			TATTTAAA	EHI_104370	8	15	3.22e-05	TATTTAAA
			TATTTAAA	EHI_152430	8	15	3.22e-05	TATTTAAA
			TATTTAAA	EHI_188080	8	15	3.22e-05	TATTTAAA
			TATTTAAA	EHI_017450	9	16	3.22e-05	TATTTAAA
			TATTTAAA	EHI_058820	9	16	3.22e-05	TATTTAAA
			TATTTAAA	EHI_086250	9	16	3.22e-05	TATTTAAA
			TATTTAAA	EHI_180160	10	17	3.22e-05	TATTTAAA
			TATTTAAA	EHI_075970	10	17	3.22e-05	TATTTAAA
			TATTTAAA	EHI_147000	11	18	3.22e-05	TATTTAAA
			TATTTAAA	EHI_050980	11	18	3.22e-05	TATTTAAA
			TATTTAAA	EHI_151420	11	18	3.22e-05	TATTTAAA
			TATTTAAA	EHI_114770	13	20	3.22e-05	TATTTAAA
			TATTTAAA	EHI_109570	13	20	3.22e-05	TATTTAAA
			TATTTAAA	EHI_100380	14	21	3.22e-05	TATTTAAA
			TATTTAAA	EHI_040320	15	22	3.22e-05	TATTTAAA
			TATTTAAA	EHI_068730	16	23	3.22e-05	TATTTAAA
			TATTTAAA	EHI_131510	17	24	3.22e-05	TATTTAAA
			TATTTAAA	EHI_038870	18	25	3.22e-05	TATTTAAA
			TATTTAAA	EHI_142220	18	25	3.22e-05	TATTTAAA
			TATTTAAA	EHI_079880	18	25	3.22e-05	TATTTAAA
			TATTTAAA	EHI_030430	18	25	3.22e-05	TATTTAAA
			TATTTAAA	EHI_074160	19	26	3.22e-05	TATTTAAA
			TATTTAAA	EHI_013050	19	26	3.22e-05	TATTTAAA
			TATTTAAA	EHI_160220	19	26	3.22e-05	TATTTAAA
			TATTTAAA	EHI_008780	20	27	3.22e-05	TATTTAAA
			TATTTAAA	EHI_194210	22	29	3.22e-05	TATTTAAA
			TATTTAAA	EHI_153340	22	29	3.22e-05	TATTTAAA
			TATTTAAA	EHI_058100	23	30	3.22e-05	TATTTAAA
			TATTTAAA	EHI_007280	23	30	3.22e-05	TATTTAAA
			TATTTAAA	EHI_008040	24	31	3.22e-05	TATTTAAA
			TATTTAAA	EHI_028940	24	31	3.22e-05	TATTTAAA
			TATTTAAA	EHI_035270	24	31	3.22e-05	TATTTAAA
			TATTTAAA	EHI_093730	25	32	3.22e-05	TATTTAAA
			TATTTAAA	EHI_173490	25	32	3.22e-05	TATTTAAA
			TATTTAAA	EHI_148210	25	32	3.22e-05	TATTTAAA
			TATTTAAA	EHI_155330	25	32	3.22e-05	TATTTAAA
			TATTTAAA	EHI_177510	26	33	3.22e-05	TATTTAAA
			TATTTAAA	EHI_006730	26	33	3.22e-05	TATTTAAA
			TATTTAAA	EHI_045360	27	34	3.22e-05	TATTTAAA
			TATTTAAA	EHI_197270	27	34	3.22e-05	TATTTAAA
			TATTTAAA	EHI_015410	28	35	3.22e-05	TATTTAAA
			TATTTAAA	EHI_139450	28	35	3.22e-05	TATTTAAA
			TATTTAAA	EHI_174900	28	35	3.22e-05	TATTTAAA
			TATTTAAA	EHI_103500	29	36	3.22e-05	TATTTAAA
			TATTTAAA	EHI_018610	29	36	3.22e-05	TATTTAAA
			TATTTAAA	EHI_183130	30	37	3.22e-05	TATTTAAA
			TATTTAAA	EHI_020240	30	37	3.22e-05	TATTTAAA
			TATTTAAA	EHI_127120	31	38	3.22e-05	TATTTAAA
			TATTTAAA	EHI_125310	31	38	3.22e-05	TATTTAAA
			TATTTAAA	EHI_093960	31	38	3.22e-05	TATTTAAA
			TATTTAAA	EHI_014190	33	40	3.22e-05	TATTTAAA
			TATTTAAA	EHI_090250	34	41	3.22e-05	TATTTAAA
			TATTTAAA	EHI_164760	35	42	3.22e-05	TATTTAAA
			TATTTAAA	EHI_012490	35	42	3.22e-05	TATTTAAA
			TATTTAAA	EHI_049900	37	44	3.22e-05	TATTTAAA
			TATTTAAA	EHI_159310	37	44	3.22e-05	TATTTAAA
			TATTTAAA	EHI_135760	37	44	3.22e-05	TATTTAAA
			TATTTAAA	EHI_036860	38	45	3.22e-05	TATTTAAA
			TATTTAAA	EHI_170470	38	45	3.22e-05	TATTTAAA
			TATTTAAA	EHI_035790	38	45	3.22e-05	TATTTAAA
			TATTTAAA	EHI_137920	39	46	3.22e-05	TATTTAAA
			TATTTAAA	EHI_183030	39	46	3.22e-05	TATTTAAA
			TATTTAAA	EHI_104380	40	47	3.22e-05	TATTTAAA
			TATTTAAA	EHI_068030	41	48	3.22e-05	TATTTAAA
			TATTTAAA	EHI_079900	41	48	3.22e-05	TATTTAAA
			TATTTAAA	EHI_196960	41	48	3.22e-05	TATTTAAA
			TATTTAAA	EHI_189300	42	49	3.22e-05	TATTTAAA
			TATTTAAA	EHI_188210	42	49	3.22e-05	TATTTAAA
			TATTTAAA	EHI_029380	42	49	3.22e-05	TATTTAAA
			TATTTAAA	EHI_062680	42	49	3.22e-05	TATTTAAA
			TATTTAAA	EHI_029570	42	49	3.22e-05	TATTTAAA
			TATTTAAA	EHI_152350	43	50	3.22e-05	TATTTAAA
			TATTTAAA	EHI_177560	43	50	3.22e-05	TATTTAAA
			TATTTAAA	EHI_067580	44	51	3.22e-05	TATTTAAA
			TATTTAAA	EHI_112890	45	52	3.22e-05	TATTTAAA
			TATTTAAA	EHI_040610	45	52	3.22e-05	TATTTAAA
			TATTTAAA	EHI_027710	46	53	3.22e-05	TATTTAAA
			TATTTAAA	EHI_155740	46	53	3.22e-05	TATTTAAA
			TATTTAAA	EHI_040360	46	53	3.22e-05	TATTTAAA
			TATTTAAA	EHI_005920	46	53	3.22e-05	TATTTAAA
			TATTTAAA	EHI_148080	47	54	3.22e-05	TATTTAAA
			TATTTAAA	EHI_009510	47	54	3.22e-05	TATTTAAA
			TATTTAAA	EHI_113580	47	54	3.22e-05	TATTTAAA
			TATTTAAA	EHI_012000	48	55	3.22e-05	TATTTAAA
			TATTTAAA	EHI_151280	48	55	3.22e-05	TATTTAAA
			TATTTAAA	EHI_151930	48	55	3.22e-05	TATTTAAA
			TATTTAAA	EHI_199080	48	55	3.22e-05	TATTTAAA
			TATTTAAA	EHI_045190	48	55	3.22e-05	TATTTAAA
			TATTTAAA	EHI_096260	49	56	3.22e-05	TATTTAAA
			TATTTAAA	EHI_099840	49	56	3.22e-05	TATTTAAA
			TATTTAAA	EHI_147480	50	57	3.22e-05	TATTTAAA
			TATTTAAA	EHI_200070	50	57	3.22e-05	TATTTAAA
			TATTTAAA	EHI_024240	50	57	3.22e-05	TATTTAAA
			TATTTAAA	EHI_092150	52	59	3.22e-05	TATTTAAA
			TATTTAAA	EHI_010130	52	59	3.22e-05	TATTTAAA
			TATTTAAA	EHI_148700	52	59	3.22e-05	TATTTAAA
			TATTTAAA	EHI_195070	52	59	3.22e-05	TATTTAAA
			TATTTAAA	EHI_013000	52	59	3.22e-05	TATTTAAA
			TATTTAAA	EHI_141340	52	59	3.22e-05	TATTTAAA
			TATTTAAA	EHI_097960	52	59	3.22e-05	TATTTAAA
			TATTTAAA	EHI_114390	53	60	3.22e-05	TATTTAAA
			TATTTAAA	EHI_201420	53	60	3.22e-05	TATTTAAA
			TATTTAAA	EHI_187000	53	60	3.22e-05	TATTTAAA
			TATTTAAA	EHI_126210	53	60	3.22e-05	TATTTAAA
			TATTTAAA	EHI_135780	53	60	3.22e-05	TATTTAAA
			TATTTAAA	EHI_160680	53	60	3.22e-05	TATTTAAA
			TATTTAAA	EHI_131880	54	61	3.22e-05	TATTTAAA
			TATTTAAA	EHI_178670	54	61	3.22e-05	TATTTAAA
			TATTTAAA	EHI_177990	54	61	3.22e-05	TATTTAAA
			TATTTAAA	EHI_197340	54	61	3.22e-05	TATTTAAA
			TATTTAAA	EHI_105340	54	61	3.22e-05	TATTTAAA
			TATTTAAA	EHI_171070	54	61	3.22e-05	TATTTAAA
			TATTTAAA	EHI_127840	54	61	3.22e-05	TATTTAAA
			TATTTAAA	EHI_126030	54	61	3.22e-05	TATTTAAA
			TATTTAAA	EHI_045450	55	62	3.22e-05	TATTTAAA
			TATTTAAA	EHI_093760	55	62	3.22e-05	TATTTAAA
			TATTTAAA	EHI_155580	55	62	3.22e-05	TATTTAAA
			TATTTAAA	EHI_191780	55	62	3.22e-05	TATTTAAA
			TATTTAAA	EHI_024600	55	62	3.22e-05	TATTTAAA
			TATTTAAA	EHI_055680	56	63	3.22e-05	TATTTAAA
			TATTTAAA	EHI_125290	56	63	3.22e-05	TATTTAAA
			TATTTAAA	EHI_188890	56	63	3.22e-05	TATTTAAA
			TATTTAAA	EHI_156220	56	63	3.22e-05	TATTTAAA
			TATTTAAA	EHI_035100	56	63	3.22e-05	TATTTAAA
			TATTTAAA	EHI_024490	56	63	3.22e-05	TATTTAAA
			TATTTAAA	EHI_040640	56	63	3.22e-05	TATTTAAA
			TATTTAAA	EHI_018620	56	63	3.22e-05	TATTTAAA
			TATTTAAA	EHI_148580	56	63	3.22e-05	TATTTAAA
			TATTTAAA	EHI_023400	56	63	3.22e-05	TATTTAAA
			TATTTAAA	EHI_171760	57	64	3.22e-05	TATTTAAA
			TATTTAAA	EHI_023890	57	64	3.22e-05	TATTTAAA
			TATTTAAA	EHI_090430	57	64	3.22e-05	TATTTAAA
			TATTTAAA	EHI_067260	57	64	3.22e-05	TATTTAAA
			TATTTAAA	EHI_196780	58	65	3.22e-05	TATTTAAA
			TATTTAAA	EHI_105770	58	65	3.22e-05	TATTTAAA
			TATTTAAA	EHI_137050	58	65	3.22e-05	TATTTAAA
			TATTTAAA	EHI_189960	58	65	3.22e-05	TATTTAAA
			TATTTAAA	EHI_051790	58	65	3.22e-05	TATTTAAA
			TATTTAAA	EHI_012250	58	65	3.22e-05	TATTTAAA
			TATTTAAA	EHI_025710	58	65	3.22e-05	TATTTAAA
			TATTTAAA	EHI_174250	59	66	3.22e-05	TATTTAAA
			TATTTAAA	EHI_027730	59	66	3.22e-05	TATTTAAA
			TATTTAAA	EHI_079270	59	66	3.22e-05	TATTTAAA
			TATTTAAA	EHI_199080	59	66	3.22e-05	TATTTAAA
			TATTTAAA	EHI_093870	59	66	3.22e-05	TATTTAAA
			TATTTAAA	EHI_111840	59	66	3.22e-05	TATTTAAA
			TATTTAAA	EHI_013120	59	66	3.22e-05	TATTTAAA
			TATTTAAA	EHI_006030	59	66	3.22e-05	TATTTAAA
			TATTTAAA	EHI_067390	60	67	3.22e-05	TATTTAAA
			TATTTAAA	EHI_035760	60	67	3.22e-05	TATTTAAA
			TATTTAAA	EHI_142870	60	67	3.22e-05	TATTTAAA
			TATTTAAA	EHI_121870	60	67	3.22e-05	TATTTAAA
			TATTTAAA	EHI_130720	60	67	3.22e-05	TATTTAAA
			TATTTAAA	EHI_154700	61	68	3.22e-05	TATTTAAA
			TATTTAAA	EHI_051040	61	68	3.22e-05	TATTTAAA
			TATTTAAA	EHI_163480	61	68	3.22e-05	TATTTAAA
			TATTTAAA	EHI_022270	61	68	3.22e-05	TATTTAAA
			TATTTAAA	EHI_020980	61	68	3.22e-05	TATTTAAA
			TATTTAAA	EHI_105090	61	68	3.22e-05	TATTTAAA
			TATTTAAA	EHI_166410	61	68	3.22e-05	TATTTAAA
			TATTTAAA	EHI_019630	61	68	3.22e-05	TATTTAAA
			TATTTAAA	EHI_181710	61	68	3.22e-05	TATTTAAA
			TATTTAAA	EHI_095310	61	68	3.22e-05	TATTTAAA
			TATTTAAA	EHI_114190	61	68	3.22e-05	TATTTAAA
			TATTTAAA	EHI_130980	61	68	3.22e-05	TATTTAAA
			TATTTAAA	EHI_103260	61	68	3.22e-05	TATTTAAA
			TATTTAAA	EHI_107300	62	69	3.22e-05	TATTTAAA
			TATTTAAA	EHI_022290	62	69	3.22e-05	TATTTAAA
			TATTTAAA	EHI_175450	62	69	3.22e-05	TATTTAAA
			TATTTAAA	EHI_105120	62	69	3.22e-05	TATTTAAA
			TATTTAAA	EHI_126530	62	69	3.22e-05	TATTTAAA
			TATTTAAA	EHI_014260	62	69	3.22e-05	TATTTAAA
			TATTTAAA	EHI_116050	62	69	3.22e-05	TATTTAAA
			TATTTAAA	EHI_139440	62	69	3.22e-05	TATTTAAA
			TATTTAAA	EHI_045460	62	69	3.22e-05	TATTTAAA
			TATTTAAA	EHI_171450	62	69	3.22e-05	TATTTAAA
			TATTTAAA	EHI_025390	62	69	3.22e-05	TATTTAAA
			TATTTAAA	EHI_152270	63	70	3.22e-05	TATTTAAA
			TATTTAAA	EHI_082240	63	70	3.22e-05	TATTTAAA
			TATTTAAA	EHI_085950	63	70	3.22e-05	TATTTAAA
			TATTTAAA	EHI_099200	63	70	3.22e-05	TATTTAAA
			TATTTAAA	EHI_105110	63	70	3.22e-05	TATTTAAA
			TATTTAAA	EHI_083620	63	70	3.22e-05	TATTTAAA
			TATTTAAA	EHI_137940	63	70	3.22e-05	TATTTAAA
			TATTTAAA	EHI_055960	64	71	3.22e-05	TATTTAAA
			TATTTAAA	EHI_155260	64	71	3.22e-05	TATTTAAA
			TATTTAAA	EHI_174970	64	71	3.22e-05	TATTTAAA
			TATTTAAA	EHI_107110	64	71	3.22e-05	TATTTAAA
			TATTTAAA	EHI_152130	64	71	3.22e-05	TATTTAAA
			TATTTAAA	EHI_020270	64	71	3.22e-05	TATTTAAA
			TATTTAAA	EHI_130490	64	71	3.22e-05	TATTTAAA
			TATTTAAA	EHI_049290	64	71	3.22e-05	TATTTAAA
			TATTTAAA	EHI_024430	64	71	3.22e-05	TATTTAAA
			TATTTAAA	EHI_056120	64	71	3.22e-05	TATTTAAA
			TATTTAAA	EHI_161970	65	72	3.22e-05	TATTTAAA
			TATTTAAA	EHI_065890	65	72	3.22e-05	TATTTAAA
			TATTTAAA	EHI_201230	65	72	3.22e-05	TATTTAAA
			TATTTAAA	EHI_081290	65	72	3.22e-05	TATTTAAA
			TATTTAAA	EHI_151300	66	73	3.22e-05	TATTTAAA
			TATTTAAA	EHI_101630	66	73	3.22e-05	TATTTAAA
			TATTTAAA	EHI_073060	66	73	3.22e-05	TATTTAAA
			TATTTAAA	EHI_185250	66	73	3.22e-05	TATTTAAA
			TATTTAAA	EHI_008420	66	73	3.22e-05	TATTTAAA
			TATTTAAA	EHI_079300	66	73	3.22e-05	TATTTAAA
			TATTTAAA	EHI_079985	66	73	3.22e-05	TATTTAAA
			TATTTAAA	EHI_129340	66	73	3.22e-05	TATTTAAA
			TATTTAAA	EHI_107170	66	73	3.22e-05	TATTTAAA
			TATTTAAA	EHI_009610	67	74	3.22e-05	TATTTAAA
			TATTTAAA	EHI_089670	67	74	3.22e-05	TATTTAAA
			TATTTAAA	EHI_022490	67	74	3.22e-05	TATTTAAA
			TATTTAAA	EHI_064470	67	74	3.22e-05	TATTTAAA
			TATTTAAA	EHI_096380	67	74	3.22e-05	TATTTAAA
			TATTTAAA	EHI_079280	67	74	3.22e-05	TATTTAAA
			TATTTAAA	EHI_012070	68	75	3.22e-05	TATTTAAA
			TATTTAAA	EHI_089100	68	75	3.22e-05	TATTTAAA
			TATTTAAA	EHI_045050	68	75	3.22e-05	TATTTAAA
			TATTTAAA	EHI_176580	69	76	3.22e-05	TATTTAAA
			TATTTAAA	EHI_176590	69	76	3.22e-05	TATTTAAA
			TATTTAAA	EHI_144270	69	76	3.22e-05	TATTTAAA
			TATTTAAA	EHI_152380	69	76	3.22e-05	TATTTAAA
			TATTTAAA	EHI_116830	69	76	3.22e-05	TATTTAAA
			TATTTAAA	EHI_026430	69	76	3.22e-05	TATTTAAA
			TATTTAAA	EHI_176700	69	76	3.22e-05	TATTTAAA
			TATTTAAA	EHI_109120	70	77	3.22e-05	TATTTAAA
			TATTTAAA	EHI_161020	70	77	3.22e-05	TATTTAAA
			TATTTAAA	EHI_130480	70	77	3.22e-05	TATTTAAA
			TATTTAAA	EHI_192470	74	81	3.22e-05	TATTTAAA
			TATTTAAA	EHI_188250	75	82	3.22e-05	TATTTAAA
			TATTTAAA	EHI_153180	75	82	3.22e-05	TATTTAAA
			TATTTAAA	EHI_067570	78	85	3.22e-05	TATTTAAA
			TATTTAAA	EHI_012250	79	86	3.22e-05	TATTTAAA
			TATTTAAA	EHI_188160	82	89	3.22e-05	TATTTAAA
			TATTTAAA	EHI_189100	83	90	3.22e-05	TATTTAAA
			TATTTAAA	EHI_087910	83	90	3.22e-05	TATTTAAA
			TATTTAAA	EHI_148450	83	90	3.22e-05	TATTTAAA
			TATTTAAA	EHI_024400	83	90	3.22e-05	TATTTAAA
			TATTTAAA	EHI_163640	84	91	3.22e-05	TATTTAAA
			TATTTAAA	EHI_010320	85	92	3.22e-05	TATTTAAA
			TATTTAAA	EHI_044360	85	92	3.22e-05	TATTTAAA
			TATTTAAA	EHI_103290	85	92	3.22e-05	TATTTAAA
			TATTTAAA	EHI_147470	86	93	3.22e-05	TATTTAAA
			TATTTAAA	EHI_186750	86	93	3.22e-05	TATTTAAA
			TATTTAAA	EHI_040320	86	93	3.22e-05	TATTTAAA
			TATTTAAA	EHI_179810	87	94	3.22e-05	TATTTAAA
			TATTTAAA	EHI_118250	87	94	3.22e-05	TATTTAAA
			TATTTAAA	EHI_035530	87	94	3.22e-05	TATTTAAA
			TATTTAAA	EHI_013190	87	94	3.22e-05	TATTTAAA
			TATTTAAA	EHI_196540	88	95	3.22e-05	TATTTAAA
			TATTTAAA	EHI_027760	88	95	3.22e-05	TATTTAAA
			TATTTAAA	EHI_107070	88	95	3.22e-05	TATTTAAA
			TATTTAAA	EHI_195020	88	95	3.22e-05	TATTTAAA
			TATTTAAA	EHI_181600	88	95	3.22e-05	TATTTAAA
			TATTTAAA	EHI_121740	88	95	3.22e-05	TATTTAAA
			TATTTAAA	EHI_012140	89	96	3.22e-05	TATTTAAA
			TATTTAAA	EHI_188820	90	97	3.22e-05	TATTTAAA
			TATTTAAA	EHI_109570	90	97	3.22e-05	TATTTAAA
			TATTTAAA	EHI_062830	90	97	3.22e-05	TATTTAAA
			TATTTAAA	EHI_188160	91	98	3.22e-05	TATTTAAA
			TATTTAAA	EHI_008040	91	98	3.22e-05	TATTTAAA
			TATTTAAA	EHI_051700	91	98	3.22e-05	TATTTAAA
			TATTTAAA	EHI_151540	91	98	3.22e-05	TATTTAAA
			TATTTAAA	EHI_048650	92	99	3.22e-05	TATTTAAA
			TATTTAAA	EHI_198730	93	100	3.22e-05	TATTTAAA
			TATTTAAA	EHI_193320	93	100	3.22e-05	TATTTAAA
			TATTTAAA	EHI_177550	93	100	3.22e-05	TATTTAAA
			TATTTAAA	EHI_051000	94	101	3.22e-05	TATTTAAA
			TATTTAAA	EHI_068420	94	101	3.22e-05	TATTTAAA
			TATTTAAA	EHI_196940	94	101	3.22e-05	TATTTAAA
			TATTTAAA	EHI_024370	94	101	3.22e-05	TATTTAAA
			TATTTAAA	EHI_170020	94	101	3.22e-05	TATTTAAA
			TATTTAAA	EHI_103740	94	101	3.22e-05	TATTTAAA
			TATTTAAA	EHI_024500	94	101	3.22e-05	TATTTAAA
			TATTTAAA	EHI_100440	94	101	3.22e-05	TATTTAAA
			TATTTAAA	EHI_125920	96	103	3.22e-05	TATTTAAA

## Sheet: L core promoter
		Core promoter sequences in L class.
		Core Promoter Motifs	Gene_ID	start	stop	p-value	matched_sequence
		TATTTAAA	EHI_033730	56	63	3.22e-05	TATTTAAA
		TATTTAAA	EHI_033730	94	101	3.22e-05	TATTTAAA
		TATTTAAA	EHI_080230	27	34	3.22e-05	TATTTAAA
		TATTTAAA	EHI_080230	59	66	3.22e-05	TATTTAAA
		TATTTAAA	EHI_086010	94	101	3.22e-05	TATTTAAA
		TATTTAAA	EHI_187010	94	101	3.22e-05	TATTTAAA
		AAAAATTCA	EHI_043740	92	100	7.94e-06	AAAAATTCA
		AAAGAACT	EHI_081760	92	99	2.41e-05	AAAGAACT
		TATTTAAA	EHI_020870	90	97	3.22e-05	TATTTAAA
		TATTTAAA	EHI_105780	90	97	3.22e-05	TATTTAAA
		TATTTAAA	EHI_107910	89	96	3.22e-05	TATTTAAA
		TATTTAAA	EHI_192070	89	96	3.22e-05	TATTTAAA
		TATTTAAA	EHI_077260	88	95	3.22e-05	TATTTAAA
		TATTTAAA	EHI_178760	88	95	3.22e-05	TATTTAAA
		TATTTAAA	EHI_184250	87	94	3.22e-05	TATTTAAA
		AAAAATTCA	EHI_012220	86	94	7.94e-06	AAAAATTCA
		TATTTAAA	EHI_148570	86	93	3.22e-05	TATTTAAA
		TATTTAAA	EHI_155210	86	93	3.22e-05	TATTTAAA
		AAAAATTCA	EHI_186870	85	93	7.94e-06	AAAAATTCA
		AAAAATTCA	EHI_055390	84	92	7.94e-06	AAAAATTCA
		AAAGAACT	EHI_023330	83	90	2.41e-05	AAAGAACT
		AAAGAACT	EHI_083640	82	89	2.41e-05	AAAGAACT
		AAAGAACT	EHI_111750	82	89	2.41e-05	AAAGAACT
		AAAGAACT	EHI_118610	82	89	2.41e-05	AAAGAACT
		AAAGAACT	EHI_012580	81	88	2.41e-05	AAAGAACT
		AAAGAACT	EHI_054760	81	88	2.41e-05	AAAGAACT
		AAAGAACT	EHI_074820	81	88	2.41e-05	AAAGAACT
		AAAGAACT	EHI_110330	81	88	2.41e-05	AAAGAACT
		AAAGAACT	EHI_017580	80	87	2.41e-05	AAAGAACT
		AAAGAACT	EHI_064690	80	87	2.41e-05	AAAGAACT
		AAAGAACT	EHI_149530	80	87	2.41e-05	AAAGAACT
		AAAGAACT	EHI_006140	79	86	2.41e-05	AAAGAACT
		AAAGAACT	EHI_023420	79	86	2.41e-05	AAAGAACT
		AAAGAACT	EHI_035550	79	86	2.41e-05	AAAGAACT
		AAAGAACT	EHI_078570	79	86	2.41e-05	AAAGAACT
		AAAGAACT	EHI_118790	79	86	2.41e-05	AAAGAACT
		AAAGAACT	EHI_129300	79	86	2.41e-05	AAAGAACT
		AAAGAACT	EHI_166260	79	86	2.41e-05	AAAGAACT
		AAAGAACT	EHI_021350	78	85	2.41e-05	AAAGAACT
		AAAGAACT	EHI_028980	78	85	2.41e-05	AAAGAACT
		AAAGAACT	EHI_029100	78	85	2.41e-05	AAAGAACT
		TATTTAAA	EHI_103360	78	85	3.22e-05	TATTTAAA
		AAAGAACT	EHI_030900	77	84	2.41e-05	AAAGAACT
		AAAGAACT	EHI_138550	77	84	2.41e-05	AAAGAACT
		AAAGAACT	EHI_152960	77	84	2.41e-05	AAAGAACT
		AAAGAACT	EHI_167350	77	84	2.41e-05	AAAGAACT
		AAAAATTCA	EHI_178610	77	85	7.94e-06	AAAAATTCA
		TATTTAAA	EHI_011230	76	83	3.22e-05	TATTTAAA
		TATTTAAA	EHI_033860	76	83	3.22e-05	TATTTAAA
		TATTTAAA	EHI_071330	76	83	3.22e-05	TATTTAAA
		TATTTAAA	EHI_104930	76	83	3.22e-05	TATTTAAA
		AAAGAACT	EHI_114130	76	83	2.41e-05	AAAGAACT
		TATTTAAA	EHI_142700	76	83	3.22e-05	TATTTAAA
		AAAGAACT	EHI_189160	76	83	2.41e-05	AAAGAACT
		TATTTAAA	EHI_193830	76	83	3.22e-05	TATTTAAA
		AAAGAACT	EHI_001110	75	82	2.41e-05	AAAGAACT
		AAAGAACT	EHI_011660	75	82	2.41e-05	AAAGAACT
		AAAGAACT	EHI_073550	75	82	2.41e-05	AAAGAACT
		AAAAATTCA	EHI_151830	75	83	7.94e-06	AAAAATTCA
		AAAGAACT	EHI_008020	74	81	2.41e-05	AAAGAACT
		AAAGAACT	EHI_015990	74	81	2.41e-05	AAAGAACT
		AAAGAACT	EHI_045040	74	81	2.41e-05	AAAGAACT
		AAAGAACT	EHI_192280	74	81	2.41e-05	AAAGAACT
		AAAGAACT	EHI_059700	73	80	2.41e-05	AAAGAACT
		TATTTAAA	EHI_109020	73	80	3.22e-05	TATTTAAA
		AAAGAACT	EHI_114160	73	80	2.41e-05	AAAGAACT
		AAAGAACT	EHI_126180	73	80	2.41e-05	AAAGAACT
		AAAGAACT	EHI_131920	73	80	2.41e-05	AAAGAACT
		AAAGAACT	EHI_137670	73	80	2.41e-05	AAAGAACT
		AAAGAACT	EHI_148570	73	80	2.41e-05	AAAGAACT
		AAAGAACT	EHI_154180	73	80	2.41e-05	AAAGAACT
		AAAGAACT	EHI_159140	73	80	2.41e-05	AAAGAACT
		AAAGAACT	EHI_164940	73	80	2.41e-05	AAAGAACT
		AAAGAACT	EHI_033720	72	79	2.41e-05	AAAGAACT
		AAAGAACT	EHI_053210	72	79	2.41e-05	AAAGAACT
		AAAGAACT	EHI_055370	72	79	2.41e-05	AAAGAACT
		AAAGAACT	EHI_079290	72	79	2.41e-05	AAAGAACT
		AAAGAACT	EHI_081800	72	79	2.41e-05	AAAGAACT
		AAAGAACT	EHI_091520	72	79	2.41e-05	AAAGAACT
		AAAGAACT	EHI_098830	72	79	2.41e-05	AAAGAACT
		AAAGAACT	EHI_137730	72	79	2.41e-05	AAAGAACT
		AAAGAACT	EHI_138490	72	79	2.41e-05	AAAGAACT
		AAAGAACT	EHI_141850	72	79	2.41e-05	AAAGAACT
		AAAGAACT	EHI_008350	71	78	2.41e-05	AAAGAACT
		AAAGAACT	EHI_028890	71	78	2.41e-05	AAAGAACT
		AAAGAACT	EHI_050860	71	78	2.41e-05	AAAGAACT
		AAAGAACT	EHI_085690	71	78	2.41e-05	AAAGAACT
		AAAGAACT	EHI_128700	71	78	2.41e-05	AAAGAACT
		AAAGAACT	EHI_153550	71	78	2.41e-05	AAAGAACT
		TATTTAAA	EHI_156390	71	78	3.22e-05	TATTTAAA
		AAAGAACT	EHI_159580	71	78	2.41e-05	AAAGAACT
		AAAGAACT	EHI_197330	71	78	2.41e-05	AAAGAACT
		AAAGAACT	EHI_015290	70	77	2.41e-05	AAAGAACT
		AAAGAACT	EHI_024610	70	77	2.41e-05	AAAGAACT
		AAAGAACT	EHI_029520	70	77	2.41e-05	AAAGAACT
		AAAGAACT	EHI_035950	70	77	2.41e-05	AAAGAACT
		TATTTAAA	EHI_044700	70	77	3.22e-05	TATTTAAA
		TATTTAAA	EHI_115160	70	77	3.22e-05	TATTTAAA
		AAAGAACT	EHI_117970	70	77	2.41e-05	AAAGAACT
		AAAGAACT	EHI_131950	70	77	2.41e-05	AAAGAACT
		AAAGAACT	EHI_194290	70	77	2.41e-05	AAAGAACT
		TATTTAAA	EHI_195260	70	77	3.22e-05	TATTTAAA
		TATTTAAA	EHI_022500	69	76	3.22e-05	TATTTAAA
		TATTTAAA	EHI_025990	69	76	3.22e-05	TATTTAAA
		AAAGAACT	EHI_041880	69	76	2.41e-05	AAAGAACT
		TATTTAAA	EHI_045380	69	76	3.22e-05	TATTTAAA
		AAAGAACT	EHI_046640	69	76	2.41e-05	AAAGAACT
		AAAGAACT	EHI_069240	69	76	2.41e-05	AAAGAACT
		TATTTAAA	EHI_126550	69	76	3.22e-05	TATTTAAA
		TATTTAAA	EHI_157260	69	76	3.22e-05	TATTTAAA
		AAAGAACT	EHI_197380	69	76	2.41e-05	AAAGAACT
		TATTTAAA	EHI_199470	69	76	3.22e-05	TATTTAAA
		AAAGAACT	EHI_015400	68	75	2.41e-05	AAAGAACT
		TATTTAAA	EHI_037920	68	75	3.22e-05	TATTTAAA
		AAAGAACT	EHI_040260	68	75	2.41e-05	AAAGAACT
		AAAGAACT	EHI_046590	68	75	2.41e-05	AAAGAACT
		AAAGAACT	EHI_130890	68	75	2.41e-05	AAAGAACT
		TATTTAAA	EHI_176380	68	75	3.22e-05	TATTTAAA
		TATTTAAA	EHI_189750	68	75	3.22e-05	TATTTAAA
		AAAGAACT	EHI_016470	67	74	2.41e-05	AAAGAACT
		AAAGAACT	EHI_047920	67	74	2.41e-05	AAAGAACT
		AAAGAACT	EHI_091450	67	74	2.41e-05	AAAGAACT
		TATTTAAA	EHI_091680	67	74	3.22e-05	TATTTAAA
		TATTTAAA	EHI_108490	67	74	3.22e-05	TATTTAAA
		TATTTAAA	EHI_114950	67	74	3.22e-05	TATTTAAA
		AAAGAACT	EHI_119780	67	74	2.41e-05	AAAGAACT
		TATTTAAA	EHI_129470	67	74	3.22e-05	TATTTAAA
		TATTTAAA	EHI_195250	67	74	3.22e-05	TATTTAAA
		TATTTAAA	EHI_009480	66	73	3.22e-05	TATTTAAA
		AAAGAACT	EHI_020600	66	73	2.41e-05	AAAGAACT
		TATTTAAA	EHI_032060	66	73	3.22e-05	TATTTAAA
		TATTTAAA	EHI_077290	66	73	3.22e-05	TATTTAAA
		TATTTAAA	EHI_080100	66	73	3.22e-05	TATTTAAA
		AAAGAACT	EHI_093890	66	73	2.41e-05	AAAGAACT
		AAAGAACT	EHI_102380	66	73	2.41e-05	AAAGAACT
		TATTTAAA	EHI_102600	66	73	3.22e-05	TATTTAAA
		AAAGAACT	EHI_104570	66	73	2.41e-05	AAAGAACT
		TATTTAAA	EHI_114000	66	73	3.22e-05	TATTTAAA
		TATTTAAA	EHI_115170	66	73	3.22e-05	TATTTAAA
		AAAGAACT	EHI_120860	66	73	2.41e-05	AAAGAACT
		TATTTAAA	EHI_123850	66	73	3.22e-05	TATTTAAA
		TATTTAAA	EHI_144390	66	73	3.22e-05	TATTTAAA
		TATTTAAA	EHI_144490	66	73	3.22e-05	TATTTAAA
		TATTTAAA	EHI_146100	66	73	3.22e-05	TATTTAAA
		AAAGAACT	EHI_156410	66	73	2.41e-05	AAAGAACT
		TATTTAAA	EHI_158210	66	73	3.22e-05	TATTTAAA
		AAAGAACT	EHI_169940	66	73	2.41e-05	AAAGAACT
		AAAGAACT	EHI_178130	66	73	2.41e-05	AAAGAACT
		TATTTAAA	EHI_200950	66	73	3.22e-05	TATTTAAA
		TATTTAAA	EHI_141100	65	72	3.22e-05	TATTTAAA
		TATTTAAA	EHI_143940	65	72	3.22e-05	TATTTAAA
		TATTTAAA	EHI_004060	64	71	3.22e-05	TATTTAAA
		AAAAATTCA	EHI_012180	64	72	7.94e-06	AAAAATTCA
		TATTTAAA	EHI_064600	64	71	3.22e-05	TATTTAAA
		AAAGAACT	EHI_073280	64	71	2.41e-05	AAAGAACT
		TATTTAAA	EHI_095450	64	71	3.22e-05	TATTTAAA
		TATTTAAA	EHI_104230	64	71	3.22e-05	TATTTAAA
		TATTTAAA	EHI_133780	64	71	3.22e-05	TATTTAAA
		TATTTAAA	EHI_149850	64	71	3.22e-05	TATTTAAA
		AAAGAACT	EHI_151470	64	71	2.41e-05	AAAGAACT
		AAAGAACT	EHI_010590	63	70	2.41e-05	AAAGAACT
		TATTTAAA	EHI_069240	63	70	3.22e-05	TATTTAAA
		AAAAATTCA	EHI_078730	63	71	7.94e-06	AAAAATTCA
		AAAGAACT	EHI_118420	63	70	2.41e-05	AAAGAACT
		AAAGAACT	EHI_127150	63	70	2.41e-05	AAAGAACT
		AAAGAACT	EHI_153310	63	70	2.41e-05	AAAGAACT
		TATTTAAA	EHI_159610	63	70	3.22e-05	TATTTAAA
		AAAGAACT	EHI_189910	63	70	2.41e-05	AAAGAACT
		AAAGAACT	EHI_033900	62	69	2.41e-05	AAAGAACT
		AAAGAACT	EHI_101420	62	69	2.41e-05	AAAGAACT
		AAAGAACT	EHI_104900	62	69	2.41e-05	AAAGAACT
		AAAGAACT	EHI_142670	62	69	2.41e-05	AAAGAACT
		AAAGAACT	EHI_147860	62	69	2.41e-05	AAAGAACT
		TATTTAAA	EHI_147990	62	69	3.22e-05	TATTTAAA
		TATTTAAA	EHI_180390	62	69	3.22e-05	TATTTAAA
		AAAGAACT	EHI_010000	61	68	2.41e-05	AAAGAACT
		TATTTAAA	EHI_022600	61	68	3.22e-05	TATTTAAA
		TATTTAAA	EHI_031290	61	68	3.22e-05	TATTTAAA
		TATTTAAA	EHI_067720	61	68	3.22e-05	TATTTAAA
		TATTTAAA	EHI_074580	61	68	3.22e-05	TATTTAAA
		TATTTAAA	EHI_089450	61	68	3.22e-05	TATTTAAA
		AAAGAACT	EHI_134980	61	68	2.41e-05	AAAGAACT
		AAAGAACT	EHI_155750	61	68	2.41e-05	AAAGAACT
		TATTTAAA	EHI_162810	61	68	3.22e-05	TATTTAAA
		AAAGAACT	EHI_010150	60	67	2.41e-05	AAAGAACT
		AAAGAACT	EHI_021570	60	67	2.41e-05	AAAGAACT
		TATTTAAA	EHI_037180	60	67	3.22e-05	TATTTAAA
		TATTTAAA	EHI_043030	60	67	3.22e-05	TATTTAAA
		TATTTAAA	EHI_107220	60	67	3.22e-05	TATTTAAA
		TATTTAAA	EHI_174650	60	67	3.22e-05	TATTTAAA
		TATTTAAA	EHI_015220	59	66	3.22e-05	TATTTAAA
		TATTTAAA	EHI_019130	59	66	3.22e-05	TATTTAAA
		AAAGAACT	EHI_045500	59	66	2.41e-05	AAAGAACT
		AAAGAACT	EHI_057320	59	66	2.41e-05	AAAGAACT
		TATTTAAA	EHI_062080	59	66	3.22e-05	TATTTAAA
		TATTTAAA	EHI_067220	59	66	3.22e-05	TATTTAAA
		TATTTAAA	EHI_091690	59	66	3.22e-05	TATTTAAA
		TATTTAAA	EHI_095510	59	66	3.22e-05	TATTTAAA
		TATTTAAA	EHI_166940	59	66	3.22e-05	TATTTAAA
		TATTTAAA	EHI_175500	59	66	3.22e-05	TATTTAAA
		TATTTAAA	EHI_195110	59	66	3.22e-05	TATTTAAA
		TATTTAAA	EHI_009230	58	65	3.22e-05	TATTTAAA
		TATTTAAA	EHI_029930	58	65	3.22e-05	TATTTAAA
		TATTTAAA	EHI_053210	58	65	3.22e-05	TATTTAAA
		TATTTAAA	EHI_135130	58	65	3.22e-05	TATTTAAA
		AAAGAACT	EHI_139430	58	65	2.41e-05	AAAGAACT
		AAAGAACT	EHI_156680	58	65	2.41e-05	AAAGAACT
		TATTTAAA	EHI_191400	58	65	3.22e-05	TATTTAAA
		TATTTAAA	EHI_041580	57	64	3.22e-05	TATTTAAA
		TATTTAAA	EHI_093920	57	64	3.22e-05	TATTTAAA
		TATTTAAA	EHI_023440	56	63	3.22e-05	TATTTAAA
		AAAGAACT	EHI_025870	56	63	2.41e-05	AAAGAACT
		TATTTAAA	EHI_028920	56	63	3.22e-05	TATTTAAA
		TATTTAAA	EHI_030180	56	63	3.22e-05	TATTTAAA
		TATTTAAA	EHI_052190	56	63	3.22e-05	TATTTAAA
		TATTTAAA	EHI_063440	56	63	3.22e-05	TATTTAAA
		TATTTAAA	EHI_085850	56	63	3.22e-05	TATTTAAA
		AAAGAACT	EHI_127710	56	63	2.41e-05	AAAGAACT
		TATTTAAA	EHI_178790	56	63	3.22e-05	TATTTAAA
		TATTTAAA	EHI_006540	55	62	3.22e-05	TATTTAAA
		AAAGAACT	EHI_023380	55	62	2.41e-05	AAAGAACT
		TATTTAAA	EHI_140580	55	62	3.22e-05	TATTTAAA
		AAAGAACT	EHI_194830	55	62	2.41e-05	AAAGAACT
		AAAAATTCA	EHI_193340	54	62	7.94e-06	AAAAATTCA
		TATTTAAA	EHI_197370	54	61	3.22e-05	TATTTAAA
		TATTTAAA	EHI_016380	53	60	3.22e-05	TATTTAAA
		TATTTAAA	EHI_152790	53	60	3.22e-05	TATTTAAA
		AAAGAACT	EHI_019970	52	59	2.41e-05	AAAGAACT
		TATTTAAA	EHI_094080	52	59	3.22e-05	TATTTAAA
		AAAAATTCA	EHI_106320	52	60	7.94e-06	AAAAATTCA
		TATTTAAA	EHI_027030	50	57	3.22e-05	TATTTAAA
		AAAGAACT	EHI_072530	50	57	2.41e-05	AAAGAACT
		TATTTAAA	EHI_097980	50	57	3.22e-05	TATTTAAA
		TATTTAAA	EHI_192550	50	57	3.22e-05	TATTTAAA
		AAAGAACT	EHI_030180	49	56	2.41e-05	AAAGAACT
		TATTTAAA	EHI_140630	49	56	3.22e-05	TATTTAAA
		TATTTAAA	EHI_059880	48	55	3.22e-05	TATTTAAA
		AAAGAACT	EHI_190000	48	55	2.41e-05	AAAGAACT
		TATTTAAA	EHI_148310	47	54	3.22e-05	TATTTAAA
		AAAGAACT	EHI_049180	46	53	2.41e-05	AAAGAACT
		AAAGAACT	EHI_085480	46	53	2.41e-05	AAAGAACT
		AAAAATTCA	EHI_006140	45	53	7.94e-06	AAAAATTCA
		TATTTAAA	EHI_024650	45	52	3.22e-05	TATTTAAA
		TATTTAAA	EHI_065470	45	52	3.22e-05	TATTTAAA
		TATTTAAA	EHI_080210	45	52	3.22e-05	TATTTAAA
		TATTTAAA	EHI_141980	44	51	3.22e-05	TATTTAAA
		AAAGAACT	EHI_056440	43	50	2.41e-05	AAAGAACT
		TATTTAAA	EHI_092240	41	48	3.22e-05	TATTTAAA
		TATTTAAA	EHI_199610	41	48	3.22e-05	TATTTAAA
		AAAGAACT	EHI_087890	40	47	2.41e-05	AAAGAACT
		AAAGAACT	EHI_185270	37	44	2.41e-05	AAAGAACT
		TATTTAAA	EHI_062300	36	43	3.22e-05	TATTTAAA
		TATTTAAA	EHI_125640	36	43	3.22e-05	TATTTAAA
		AAAGAACT	EHI_125680	35	42	2.41e-05	AAAGAACT
		TATTTAAA	EHI_188990	35	42	3.22e-05	TATTTAAA
		TATTTAAA	EHI_097990	34	41	3.22e-05	TATTTAAA
		TATTTAAA	EHI_021470	33	40	3.22e-05	TATTTAAA
		TATTTAAA	EHI_025870	33	40	3.22e-05	TATTTAAA
		AAAGAACT	EHI_067970	33	40	2.41e-05	AAAGAACT
		AAAAATTCA	EHI_058660	32	40	7.94e-06	AAAAATTCA
		AAAAATTCA	EHI_141430	32	40	7.94e-06	AAAAATTCA
		AAAGAACT	EHI_073560	31	38	2.41e-05	AAAGAACT
		TATTTAAA	EHI_128140	30	37	3.22e-05	TATTTAAA
		AAAAATTCA	EHI_127450	28	36	7.94e-06	AAAAATTCA
		TATTTAAA	EHI_107230	27	34	3.22e-05	TATTTAAA
		AAAAATTCA	EHI_023330	26	34	7.94e-06	AAAAATTCA
		TATTTAAA	EHI_166930	25	32	3.22e-05	TATTTAAA
		TATTTAAA	EHI_098830	24	31	3.22e-05	TATTTAAA
		TATTTAAA	EHI_178610	24	31	3.22e-05	TATTTAAA
		TATTTAAA	EHI_131180	23	30	3.22e-05	TATTTAAA
		AAAGAACT	EHI_129760	22	29	2.41e-05	AAAGAACT
		TATTTAAA	EHI_178840	20	27	3.22e-05	TATTTAAA
		TATTTAAA	EHI_009910	19	26	3.22e-05	TATTTAAA
		TATTTAAA	EHI_036620	19	26	3.22e-05	TATTTAAA
		TATTTAAA	EHI_075410	19	26	3.22e-05	TATTTAAA
		TATTTAAA	EHI_010740	18	25	3.22e-05	TATTTAAA
		TATTTAAA	EHI_010000	17	24	3.22e-05	TATTTAAA
		TATTTAAA	EHI_135710	15	22	3.22e-05	TATTTAAA
		TATTTAAA	EHI_169690	15	22	3.22e-05	TATTTAAA
		TATTTAAA	EHI_175000	10	17	3.22e-05	TATTTAAA
		TATTTAAA	EHI_177410	10	17	3.22e-05	TATTTAAA
		TATTTAAA	EHI_087690	9	16	3.22e-05	TATTTAAA
		TATTTAAA	EHI_135600	9	16	3.22e-05	TATTTAAA
		TATTTAAA	EHI_014380	8	15	3.22e-05	TATTTAAA
		AAAAATTCA	EHI_043000	5	13	7.94e-06	AAAAATTCA
		TATTTAAA	EHI_124370	5	12	3.22e-05	TATTTAAA
		TATTTAAA	EHI_142130	5	12	3.22e-05	TATTTAAA
		TATTTAAA	EHI_175420	5	12	3.22e-05	TATTTAAA
		AAAGAACT	EHI_175250	4	11	2.41e-05	AAAGAACT
		TATTTAAA	EHI_169670	2	9	3.22e-05	TATTTAAA
		AAAGAACT	EHI_142890	1	8	2.41e-05	AAAGAACT
		TATTTAAA	EHI_190880	1	8	3.22e-05	TATTTAAA

## Sheet: VL core promoter
			Core promoter sequences in VL class.
			Alt ID	Sequence Name	Start	End	p-value	Matched Sequence
			AAAAATTCA	EHI_034210	11	19	7.94e-06	AAAAATTCA
			AAAAATTCA	EHI_034210	23	31	7.94e-06	AAAAATTCA
			AAAAATTCA	EHI_029390	40	48	7.94e-06	AAAAATTCA
			AAAAATTCA	EHI_144590	78	86	7.94e-06	AAAAATTCA
			AAAGAACT	EHI_070330	32	39	2.41e-05	AAAGAACT
			AAAGAACT	EHI_053470	44	51	2.41e-05	AAAGAACT
			AAAGAACT	EHI_100700	56	63	2.41e-05	AAAGAACT
			AAAGAACT	EHI_154590	56	63	2.41e-05	AAAGAACT
			AAAGAACT	EHI_150160	59	66	2.41e-05	AAAGAACT
			AAAGAACT	EHI_120570	66	73	2.41e-05	AAAGAACT
			AAAGAACT	EHI_042470	66	73	2.41e-05	AAAGAACT
			AAAGAACT	EHI_144590	70	77	2.41e-05	AAAGAACT
			AAAGAACT	EHI_174560	77	84	2.41e-05	AAAGAACT
			AAAGAACT	EHI_184670	78	85	2.41e-05	AAAGAACT
			AAAGAACT	EHI_182260	79	86	2.41e-05	AAAGAACT
			AAAGAACT	EHI_119030	79	86	2.41e-05	AAAGAACT
			AAAGAACT	EHI_121160	79	86	2.41e-05	AAAGAACT
			AAAGAACT	EHI_088500	80	87	2.41e-05	AAAGAACT
			TATTTAAA	EHI_000270	7	14	3.22e-05	TATTTAAA
			TATTTAAA	EHI_017900	8	15	3.22e-05	TATTTAAA
			TATTTAAA	EHI_190420	8	15	3.22e-05	TATTTAAA
			TATTTAAA	EHI_073630	14	21	3.22e-05	TATTTAAA
			TATTTAAA	EHI_030590	16	23	3.22e-05	TATTTAAA
			TATTTAAA	EHI_165250	19	26	3.22e-05	TATTTAAA
			TATTTAAA	EHI_109010	19	26	3.22e-05	TATTTAAA
			TATTTAAA	EHI_097890	50	57	3.22e-05	TATTTAAA
			TATTTAAA	EHI_059255	51	58	3.22e-05	TATTTAAA
			TATTTAAA	EHI_094150	52	59	3.22e-05	TATTTAAA
			TATTTAAA	EHI_013970	55	62	3.22e-05	TATTTAAA
			TATTTAAA	EHI_034710	56	63	3.22e-05	TATTTAAA
			TATTTAAA	EHI_076480	56	63	3.22e-05	TATTTAAA
			TATTTAAA	EHI_005657	56	63	3.22e-05	TATTTAAA
			TATTTAAA	EHI_017350	56	63	3.22e-05	TATTTAAA
			TATTTAAA	EHI_022620	56	63	3.22e-05	TATTTAAA
			TATTTAAA	EHI_042860	56	63	3.22e-05	TATTTAAA
			TATTTAAA	EHI_145450	58	65	3.22e-05	TATTTAAA
			TATTTAAA	EHI_052410	58	65	3.22e-05	TATTTAAA
			TATTTAAA	EHI_020840	58	65	3.22e-05	TATTTAAA
			TATTTAAA	EHI_130550	59	66	3.22e-05	TATTTAAA
			TATTTAAA	EHI_062360	59	66	3.22e-05	TATTTAAA
			TATTTAAA	EHI_020920	59	66	3.22e-05	TATTTAAA
			TATTTAAA	EHI_145340	59	66	3.22e-05	TATTTAAA
			TATTTAAA	EHI_018140	60	67	3.22e-05	TATTTAAA
			TATTTAAA	EHI_145310	61	68	3.22e-05	TATTTAAA
			TATTTAAA	EHI_145260	61	68	3.22e-05	TATTTAAA
			TATTTAAA	EHI_094150	62	69	3.22e-05	TATTTAAA
			TATTTAAA	EHI_137370	63	70	3.22e-05	TATTTAAA
			TATTTAAA	EHI_018950	63	70	3.22e-05	TATTTAAA
			TATTTAAA	EHI_124070	63	70	3.22e-05	TATTTAAA
			TATTTAAA	EHI_094580	63	70	3.22e-05	TATTTAAA
			TATTTAAA	EHI_077280	63	70	3.22e-05	TATTTAAA
			TATTTAAA	EHI_179700	63	70	3.22e-05	TATTTAAA
			TATTTAAA	EHI_178050	63	70	3.22e-05	TATTTAAA
			TATTTAAA	EHI_145160	64	71	3.22e-05	TATTTAAA
			TATTTAAA	EHI_051400	64	71	3.22e-05	TATTTAAA
			TATTTAAA	EHI_122200	64	71	3.22e-05	TATTTAAA
			TATTTAAA	EHI_180400	64	71	3.22e-05	TATTTAAA
			TATTTAAA	EHI_066620	65	72	3.22e-05	TATTTAAA
			TATTTAAA	EHI_136950	65	72	3.22e-05	TATTTAAA
			TATTTAAA	EHI_041465	65	72	3.22e-05	TATTTAAA
			TATTTAAA	EHI_105370	65	72	3.22e-05	TATTTAAA
			TATTTAAA	EHI_089000	65	72	3.22e-05	TATTTAAA
			TATTTAAA	EHI_082260	65	72	3.22e-05	TATTTAAA
			TATTTAAA	EHI_119040	65	72	3.22e-05	TATTTAAA
			TATTTAAA	EHI_079610	65	72	3.22e-05	TATTTAAA
			TATTTAAA	EHI_184810	65	72	3.22e-05	TATTTAAA
			TATTTAAA	EHI_172010	65	72	3.22e-05	TATTTAAA
			TATTTAAA	EHI_146120	66	73	3.22e-05	TATTTAAA
			TATTTAAA	EHI_072000	66	73	3.22e-05	TATTTAAA
			TATTTAAA	EHI_132250	66	73	3.22e-05	TATTTAAA
			TATTTAAA	EHI_018390	66	73	3.22e-05	TATTTAAA
			TATTTAAA	EHI_011560	66	73	3.22e-05	TATTTAAA
			TATTTAAA	EHI_040060	66	73	3.22e-05	TATTTAAA
			TATTTAAA	EHI_036490	66	73	3.22e-05	TATTTAAA
			TATTTAAA	EHI_033550	66	73	3.22e-05	TATTTAAA
			TATTTAAA	EHI_011270	66	73	3.22e-05	TATTTAAA
			TATTTAAA	EHI_075430	66	73	3.22e-05	TATTTAAA
			TATTTAAA	EHI_183210	66	73	3.22e-05	TATTTAAA
			TATTTAAA	EHI_073980	66	73	3.22e-05	TATTTAAA
			TATTTAAA	EHI_016900	66	73	3.22e-05	TATTTAAA
			TATTTAAA	EHI_188000	66	73	3.22e-05	TATTTAAA
			TATTTAAA	EHI_005060	67	74	3.22e-05	TATTTAAA
			TATTTAAA	EHI_136940	69	76	3.22e-05	TATTTAAA
			TATTTAAA	EHI_174510	69	76	3.22e-05	TATTTAAA
			TATTTAAA	EHI_026000	69	76	3.22e-05	TATTTAAA
			TATTTAAA	EHI_127670	70	77	3.22e-05	TATTTAAA
			TATTTAAA	EHI_059330	70	77	3.22e-05	TATTTAAA
			TATTTAAA	EHI_193640	70	77	3.22e-05	TATTTAAA
			TATTTAAA	EHI_184810	75	82	3.22e-05	TATTTAAA
			TATTTAAA	EHI_082260	75	82	3.22e-05	TATTTAAA
			TATTTAAA	EHI_188600	90	97	3.22e-05	TATTTAAA
			TATTTAAA	EHI_005260	90	97	3.22e-05	TATTTAAA
